1 Response of total (DNA) and metabolically active (RNA) microbial communities in *Miscanthus*  
2 × *giganteus* cultivated soil to different nitrogen fertilization rates

3

4 Jihoon Yang,<sup>1,2</sup> Jaejin Lee,<sup>1,2</sup> Jinlyung Choi,<sup>1,2\*</sup> Lanying Ma,<sup>1,2\*</sup> Emily Heaton,<sup>2,3</sup> Adina  
5 Howe<sup>1,2#</sup>

6

7 <sup>1</sup>Department of Agricultural and Biosystems Engineering, Iowa State University, Ames, Iowa,  
8 USA

9 <sup>2</sup>Center for Advanced Bioenergy and Bioproducts Innovation, Urbana, Illinois, USA

10 <sup>3</sup>Department of Agronomy, Iowa State University, Ames IA, United States

11

12 Running Title: Comparing DNA and RNA approaches in soil microbiomes

13

14 #Address correspondence to Adina Howe, [adina@iastate.edu](mailto:adina@iastate.edu)

15 \*Present address: Jinlyung Choi, Second Genome Inc., Brisbane, California, USA

16 \*Present address: Lanying Ma, VastBiome Inc, Millbrae, California, USA

17

## 18 **Abstract**

19 *Miscanthus x giganteus* is a promising high-yielding perennial plant to meet growing  
20 bioenergy demands but the degree to which the soil microbiome affects its nitrogen cycling and  
21 subsequently, biomass yield remains unclear. In this study, we hypothesize that contributions of  
22 metabolically active soil microbial membership may be underestimated with DNA-based  
23 approaches. We assessed the response of the soil microbiome to nitrogen availability in terms of  
24 both DNA and RNA soil microbial communities from the Long-term Assessment of Miscanthus  
25 Productivity and Sustainability (LAMPS) field trial. DNA and RNA were extracted from 271  
26 samples, and 16S SSU rRNA amplicon sequencing was performed to characterize microbial  
27 community structure. Significant differences were observed in the resulting soil microbiomes and  
28 were best explained by the sequencing library of origin, either DNA and RNA. Similar numbers  
29 of taxa were detected in DNA and RNA microbial communities, with more than 90% of taxa  
30 shared. However, the profile of dominant taxa within DNA and RNA differed, with varying  
31 proportions of *Actinobacteria* and *Proteobacteria* and *Firmicutes* and *Proteobacteria*. Only RNA  
32 microbial communities showed seasonal responses to nitrogen fertilization, and these differences  
33 were associated with nitrogen-cycling bacteria. The relative abundance of bacteria associated with  
34 nitrogen cycling was 7-folds higher in RNA than in DNA, and genes associated with denitrifying  
35 bacteria were significantly enriched in RNA, suggesting that these bacteria may be underestimated  
36 with DNA-only approaches. Our findings indicate that RNA-based SSU characterization can be a  
37 significant and complementing resource for understanding the role of soil microbiomes in  
38 bioenergy crop production.

39

40

## 41 **Importance**

42 *Miscanthus x giganteus* is becoming a cornerstone of bioeconomy cropping systems, but  
43 it remains unclear how the soil microbiome supplies nitrogen to this low-input crop. DNA-based  
44 techniques are used to provide community characterization but may miss important metabolically  
45 active taxa. By analyzing both DNA- and actively transcribed RNA-based microbial communities,  
46 we found that nitrogen cycling taxa in the soil microbiome may be underestimated using only  
47 DNA-based approaches. Accurately understanding the role of microbes and how they cycle  
48 nutrients is important for the development of sustainable bioenergy crops, and RNA-based  
49 approaches are recommended as a complement to DNA approaches to better understand the  
50 microbial, plant, and management interactions.

## 51 **Introduction**

52

53           The sterile allopolyploid ( $2n=3x=57$ ) *Miscanthus* × *giganteus* (Greef et Deu.) is a  
54 promising perennial grass bioenergy crop because of its ability to produce large amounts of  
55 biomass with little fertilizer compared to hay or grain crops (1–4). The peak biomass production  
56 of *M. x giganteus* has been observed to be up to three times higher than switchgrass (*Panicum*  
57 *virgatum* L. cv. Cave-in-Rock), similar to willow (*Salix schwerinii* E. Wolf × *viminalis* L.), three  
58 times higher than reed canary grass (*Phalaris arundinacea* L.), and two times higher than triticale  
59 (*Triticosecale* Wittmack) (5–7). Additionally, *M. x giganteus* production has been shown to have  
60 decreased environmental impact, with decreased requirements of nitrogen and pesticides (8, 9) and  
61 reduced nitrate leaching relative to other bioenergy crops (10, 11). These advantages of *M. x*  
62 *giganteus* and its ability to maintain high productivity for up to 20 years compared to other energy  
63 crops have contributed to its increased cultivation (9, 12–14).

64           To support its growth, environmental and management factors that can affect the  
65 productivity of *M. x giganteus* have been evaluated. Previously, *M. x giganteus* has been observed  
66 to decrease in productivity at low temperatures (15, 16). It has also been observed to have relatively  
67 high water demand (17, 18) and to require cultivation for at least three years to obtain adequate  
68 yield (16, 19–25). Recommendations for nitrogen fertilization of *M. x giganteus* are inconsistent,  
69 with previous studies showing that fertilization can have little to no effect (26–31) or contribute to  
70 its productivity (32–35).

71           Previously, it has been estimated that *M. x giganteus* can obtain 16% of its nitrogen demand  
72 from the atmosphere during the growing season (36). Nitrogen can also be provided by the activity  
73 of nitrogen-fixing bacteria in the rhizobiome of *M. x giganteus* (37), which are enriched early after  
74 *M. x giganteus* planting (36). Nitrogen fixation genes have been observed to be more abundant in

75 *M. x giganteus* relative to other energy crops planted in similar soils (38, 39). Specific phyla which  
76 have been identified in *M. x giganteus* rhizobiomes include *Actinobacteria* and *Proteobacteria*,  
77 which include known nitrogen-fixing families such as *Hyphomicrobiaceae*, *Bradyrhizobiaceae*,  
78 *Rhodospirillaceae*, and *Geobacteraceae* (40).

79 To date, all studies of *M. x giganteus* soil microbial communities and their response to  
80 fertilization or biomass production have been limited to the characterization of soil environmental  
81 DNA. We previously used sequencing of 16S rRNA genes in DNA to identify significant  
82 interactions between microbial diversity, stand age, fertilization, and above-ground biomass in *M.*  
83 *x giganteus* (41). However, it is possible that DNA-based analysis may underestimate the number  
84 of active taxa, resulting in biased interpretations of how microbial communities respond to the  
85 environment (42, 43). By contrast, RNA-based characterization of microbial communities,  
86 representing metabolically active or transcribed genes, can better relate community responses to  
87 environmental variability (44–48). Additionally, RNA-based studies are more sensitive and have  
88 detected underrepresented active bacteria that are below the amplification threshold of DNA-based  
89 approaches. Despite the advantages of RNA-based methods, direct comparison of the DNA and  
90 RNA methods for microbial community characterization in bioenergy crops soil microbial  
91 communities is sparse. One previous study of the bioenergy grass, *Pennisetum purpure*, compared  
92 bacterial communities of DNA- and RNA-based denaturing gradient gel electrophoresis (DGGE)  
93 profiles and clone libraries and found that RNA-based methods could identify enriched  
94 metabolically active membership (49).

95 In this study, we perform comparison of DNA and RNA approaches to help us better  
96 understand how soil microbiome in field-grown *M. x giganteus* can inform management and  
97 environmental impacts of *M. x giganteus* production. We evaluate the effects of stand age

98 (representing different initial growth environments) and fertilization (representing different N  
99 availability) on changes in microbial community membership and structure. We hypothesize that  
100 microbiome responses (as indicated by DNA and RNA) to *M. x giganteus* management will differ  
101 and specifically that metabolically active (RNA) microbial communities will show a more rapid  
102 and sensitive response to fertilization than total (DNA) microbial communities. To test these  
103 hypotheses, soil samples were collected from the Long-term Assessment of Miscanthus  
104 Productivity and Sustainability (LAMPS) site, a replicated chronosequence field previously used  
105 to investigate the effects of stand age and nitrogen fertilizer on *M. x giganteus* and corn (*Zea mays*  
106 L.) (28, 50). DNA and RNA were extracted from these soil samples, and we compared these  
107 microbial responses to stand age, N fertilization amount, and time since fertilization.

108

## 109 **Material and Methods**

110

### 111 **Sample description**

112 Soil samples were collected in 2018 from the Long-term Assessment of Miscanthus  
113 Productivity and Sustainability (LAMPS) site located in Central IA, USA (42.013° N, 93.743° W).  
114 This staggered-start experiment was planted with *M. x giganteus* (clone “Freedom”, AGgrow Tech,  
115 High Point NC, USA) at a density of ~11 plants m<sup>-2</sup> in replicated blocks (n=4) in each of 2015,  
116 2016 and 2017 as described previously (28). The experimental design is a split-plot replicated  
117 block with age (planting year) as the main plot and N fertilization rate as the split plot. Soils at the  
118 site are deep loams (>1m) formed over glacial till; the dominant soil type (53%) is a Webster clay  
119 loam (fine-loamy, mixed, superactive, mesic Typic Endoaquoll). Fertilizer was applied as banded  
120 urea ammonium nitrate (UAN) in aqueous solution and side-dressed into the soil at 0.1 m depth  
121 on May 9, 2018, at rates of 0, 224, and 448 kg ha<sup>-1</sup> N. Soil samples were taken on April 30, May

122 14, May 30, and July 3. Soils were collected from within 10 cm radius of the *M. x giganteus* stems  
123 using a sampling core (30.5 cm wet sample tube with 1.75cm diameter, Clements Associates Inc,  
124 USA). Soil samples included in this analysis were obtained in triplicate from 60 experimental plots  
125 at each time point and analyzed independently. Samples for DNA extraction were stored on dry  
126 ice immediately after being taken as described previously (41), and samples for RNA extraction  
127 were immediately collected and then frozen in RNAlater (Thermo Fisher Scientific, USA) which  
128 offers the advantage of preserving microbial community integrity while preventing RNA  
129 degradation (51). All samples were stored in a cooler filled with dry ice during return to the  
130 laboratory.

131

### 132 **DNA/RNA extraction and 16S rRNA gene amplicon sequencing**

133 DNA and RNA extraction was performed from subsampled 0.25 g soil samples submerged  
134 in RNAlater (Thermo Fisher Scientific, USA), using the MagAttract PowerMicrobiome  
135 DNA/RNA EP Kit (Qiagen, USA) following the standard protocol in this kit and liquid handling  
136 in Eppendorf epMotion 5075 (Eppendorf North America). The extracted RNA was transcribed  
137 into cDNA according to a standard protocol using iScript™ cDNA Synthesis Kit (BIO-RAD, USA)  
138 for sequencing analysis. The resulting DNA and RNA were analyzed for quantity using an  
139 Invitrogen™ Qubit™ 4 Fluorometer (Invitrogen, USA). DNA and RNA sample concentrations  
140 above 10 ng ul<sup>-1</sup> were normalized to 10 ng ul<sup>-1</sup> prior to sequencing. Samples with concentrations  
141 lower than 10 ng ul<sup>-1</sup> were submitted directly for sequencing. The V4 region of the bacterial 16S  
142 rRNA gene was amplified with the conserved primers 515F (5'-GTGYCAGCMGCCGCGGTAA-  
143 3') and 806R (5'-GGACTACNVGGGTWTCTAAT-3') (52, 53). Bacterial amplicon sequencing  
144 was performed on Illumina Miseq with Miseq Reagent Kit V2 (Illumina, USA) at Argonne

145 National Laboratory. The DNA and RNA sequencing data are available at NCBI Short Read  
146 Archive PRJNA601860 and PRJNA745191, respectively.

147

#### 148 **Amplicon bioinformatics and statistical analysis**

149 The *DADA2* package (version 1.13.1) in R (version 4.1.0) was used to perform quality  
150 control of sequencing libraries and to determine the abundance of amplicon sequence variants  
151 (ASV). The quality filtering parameters for all sequences were the same as previously described  
152 for DNA amplicons (41). The Ribosomal Database Project (RDP) Classifier (version 11.5) was  
153 used for taxonomic identification of each observed ASV depending on the sequence similarity to  
154 the representatives in the current database. ASVs were removed if no more than 10 total  
155 observations were observed in a sample. All statistical analyses were performed in R (version  
156 4.1.0). Two diversity indices, Chao1 and Shannon, were used to compare the alpha diversity of  
157 bacteria using the *vegan* package (version 2.5 - 7). Multivariate homogeneity of group dispersions,  
158 calculating the average distance of members to the centroid of the group, was used to analyze the  
159 dispersion of each sample using *betadisper* function from the *vegan* package (version 2.5 - 7).  
160 Significant differences in alpha diversity and homogeneity between DNA and RNA microbial  
161 communities were evaluated using the Kruskal-Wallis test with Dunn's post hoc test.  
162 Permutational multivariate analysis of variance (PERMANOVA) was performed with the *adonis*  
163 function of the *vegan* package using the Bray-Curtis dissimilarity matrix (version 2.5 - 7).  
164 PERMANOVA was performed to identify significant differences between centroids of each  
165 microbial community, and the  $R^2$  statistic represents the proportion of the variance for the  
166 separation of the microbial community that was explained by experimental and field  
167 environmental factors (i.e., origin of the sequencing library, stand age, N fertilization amount,



168 fertilization history, and time since fertilization). PERMANOVA was performed using the “strata”  
169 argument for the planted block, which was identified as one of the major factors to structure the  
170 microbial composition in the previous study, to better identify the effects of stand age and N  
171 fertilization amount, fertilization history, and time since fertilization. This analysis restricted  
172 permutations to the dataset within each block and was used to quantify variations between and  
173 within treatments (41). The comparison between the two groups within the three (stand age, N  
174 fertilization amount) or four (time since fertilization) groups was accomplished using pairwise  
175 PERMANOVA. The level of significance in the statistical analysis was defined as  $p < 0.05$ .

176

## 177 **Results**

178

### 179 **DNA and RNA microbial communities differ in microbial composition and alpha diversity**

180 The 16S rRNA amplicons from DNA and RNA from soil samples representing three ages  
181 and three fertilization rates of *M x giganteus* were compared. The origin of the sequencing library,  
182 either DNA or RNA, was found to have the greatest influence on the separation of the microbial  
183 community ( $R^2_{\text{PERMANOVA}} = 0.117$ ,  $p_{\text{PERMANOVA}} = 0.001$ , Table S1). Their influence was 3.9 times  
184 higher than that of stand age ( $R^2_{\text{PERMANOVA}} = 0.030$ ,  $p_{\text{PERMANOVA}} = 0.001$ ) and 15 times higher than  
185 that of N fertilization amount ( $R^2_{\text{PERMANOVA}} = 0.008$ ,  $p_{\text{PERMANOVA}} = 0.001$ ). DNA and RNA  
186 microbial communities were observed to separate into clear clusters using constrained analysis of  
187 principal coordinates (CAP) along the first axis of the CAP (CAP1, 11.8%,  $F = 77.56$ ,  $p_{\text{ANOVA}} =$   
188  $0.001$ , Figure 1). The microbial composition (ADONIS,  $p_{\text{ADONIS}} = 0.001$ ) and homogeneity  
189 (betadisper,  $p_{\text{betadisper}} = 0.001$ ) of DNA and RNA communities were also observed to be  
190 significantly different.

191

192 Table S1. Comparison of microbial community dissimilarity using permutational multivariate  
193 analysis of variance (PERMANOVA) for bacterial communities in *M. x giganteus* soil samples.

194

195 Figure 1. Similarities, assessed with Bray-Curtis indices, between DNA and RNA microbial  
196 communities from *M. x giganteus* soils. Constrained analysis of principal coordinates (CAP) was  
197 used to ordinate Bray-Curtis indices calculated with ASVs. Blue dot and red triangle represent the  
198 DNA and RNA microbial communities, respectively.

199

200 Alpha diversity of soil microbial communities was compared using the Shannon index,  
201 which evaluates both microbial richness and evenness, and Chao1, which evaluates the abundance  
202 of observed species. Both alpha diversity indices showed significant differences between DNA  
203 and RNA microbial communities, with higher alpha diversity observed in DNA microbial  
204 communities ( $p_{\text{Shannon}} < 0.001$ ,  $p_{\text{Chao1}} < 0.001$ , Figure 2). On average 32% and 12% higher Chao1  
205 and Shannon indices, respectively, were observed in DNA compared to RNA microbial  
206 communities. The average value of alpha diversity was higher in DNA, but the variation in alpha  
207 diversity indices was larger between RNA samples. Specifically, the DNA Chao1 index was in the  
208 range of 1,667 to 9,170, and RNA was associated with a much wider range of 195 to 9,343. Similar  
209 results were observed with Shannon indices, with DNA ranging from 4.88 to 7.85 and RNA from  
210 2.69 to 7.72.

211

212 Figure 2. Alpha diversity indices of DNA and RNA microbial communities. Richness ((A) Chao1,  
213 (B) Shannon index) were estimated for microbial communities with ASVs. Letters “\*\*\*\*” denote

214 significant differences of alpha diversity indices between DNA and RNA microbial communities  
215 at a p-value  $< 0.05$  as assessed by Kruskal-Wallis with post hoc Dunn's test.

216

### 217 **Taxa distributions varied between DNA and RNA microbial communities**

218 The total number of taxa in DNA and RNA microbial communities was estimated by  
219 observations of ASVs, where a total of 39,898 and 32,171 ASVs were identified in DNA and RNA,  
220 respectively. We compared the ASVs between DNA and RNA samples and found that 17,779  
221 ASVs were shared between DNA and RNA microbial communities (32% and 58%, respectively);  
222 22,119 and 14,392 ASVs were unique in DNA and RNA, respectively. Unique ASVs were  
223 generally low abundance (average  $< 0.000003\%$ ) and low prevalence (average  $< 0.022\%$ ) in their  
224 respective libraries (Figure 3). ASVs that were identified in both DNA and RNA were found to be  
225 identified at increased though still low abundance (average  $< 0.00005\%$ ) and higher prevalence  
226 (average  $> 0.16\%$ ).

227 ASVs commonly identified between DNA and RNA libraries were further classified based  
228 on their enrichment in DNA or RNA, specifically using the ratio of RNA:DNA relative abundances.  
229 The RNA:DNA ratio of shared ASVs ranged from 0.0023 to 1,300. The majority of shared ASVs  
230 (58%) were more enriched in RNA relative to DNA (Figure 4). For ASVs enriched in DNA  
231 (RNA:DNA ratio  $< 1$ ), the average RNA:DNA ratio was 0.44; the average RNA:DNA ratio for  
232 ASVs enriched in RNA (RNA:DNA ratio  $> 1$ ) was 4.82. Additionally, more variation was  
233 observed in shared ASVs which were enriched in RNA relative to those enriched in DNA.

234

235 Figure 3. Abundance-occupancy comparison of ASVs in the DNA and RNA microbial  
236 communities. Abundance-occupancy distributions were assessed to identify the dynamics of the

237 DNA and RNA microbial community memberships. Each point is an ASV. The ASVs were  
238 classified as (A) unique in DNA or (B) unique in RNA, respectively, when it was detected only in  
239 the DNA or RNA microbial communities. ASVs detected in both DNA and RNA microbial  
240 communities were classified as "shared" and further classified by the average relative abundance  
241 based on its enrichment in (C) DNA or (D) RNA.

242

243 Figure 4. RNA/DNA ratio comparison of the shared ASVs. The ratio of average relative abundance  
244 in DNA and RNA microbial communities of ASVs detected in both microbial communities was  
245 compared to identify the biased in the DNA and RNA-based microbial community analysis results.  
246 Shared - higher in DNA (blue) and Shared - higher in RNA (red).

247

#### 248 **Phylogenetic composition varied between DNA and RNA microbial communities**

249 The phylogenetic composition of DNA and RNA microbial communities was compared,  
250 with 20 phyla identified in both libraries. Soils were dominated by *Actinobacteria* (26%) and  
251 *Proteobacteria* (33%) in DNA and mainly *Proteobacteria* (49%) in RNA (Figure 5). While DNA  
252 and RNA had similar membership at the phylum-level, the relative abundance of every phylum  
253 significantly differed (Table S2). Thirteen out of 20 phyla were more enriched in DNA than RNA,  
254 and seven phyla were more enriched in the RNA microbial communities.

255 We evaluated whether the phyla observed to be significantly different between DNA and  
256 RNA were comprised of ASVs unique to DNA or RNA or shared between the two methods (Figure  
257 S1). ASV shared by DNA and RNA microbial communities showed more pronounced variations  
258 in microbial community structures differences. *Actinobacteria* and *Bacteroidetes* were more  
259 enriched in DNA ( $p_{\text{Kruskal-Wallis}} < 0.05$ ), while *Firmicutes* and *Proteobacteria* were more enriched

260 in the RNA microbial community ( $p_{\text{Kruskal-Wallis}} < 0.05$ ). Differentiating ASVs unique in DNA  
261 included sequences associated with *Actinobacteria*, *Gemmatimonadetes*, *Latescibacteria*, and  
262 *Parcubacteria*; in contrast, sequences associated with *Firmicutes* were unique in RNA.

263

264 Figure 5. Phylum level differences in DNA and RNA microbial communities. Relative abundances  
265 of annotated ASVs are shown, identified to their closest match in the RDP classifier. See  
266 Supplementary Table 2 for a different perspective on the dynamics of numerical relative  
267 abundance.

268

269 Table S2. Kruskal-Wallis with post hoc Dunn's test comparing the average relative abundances of  
270 phyla between DNA and RNA microbial communities.

271

272 Figure S1. Phylum level differences in DNA and RNA microbial communities based on unique  
273 ASVs in DNA or RNA only (A) or shared ASVs and their enrichment in either DNA or RNA (B).  
274 Relative abundances of annotated ASVs are shown, identified to their closest match in the RDP  
275 classifier.

276

277 **DNA and RNA microbial community compositions were variably changed by stand age, N**  
278 **fertilization amount, and time since fertilization**

279 Previously, the response of the soil microbial community at this site to plant stand age,  
280 fertilization history, and time since fertilization was studied based on DNA (41). In this study,  
281 subsets of these samples were studied to directly compare DNA and RNA 16S rRNA gene  
282 characterization. Based on DNA, community composition responded significantly to the stand age

283 and N fertilization amount. The community response based on RNA was similar, with the notable  
284 exception that time since fertilization showed a significant effect only in RNA (Table 1). The effect  
285 of stand age and N fertilization amount was generally larger in DNA than RNA, and time since  
286 fertilization had a larger effect on the RNA microbial community.

287

288 Table 1. Permutational multivariate analysis of variance (PERMANOVA) for comparing DNA  
289 and RNA microbial community dissimilarity.

290

291 Next, pairwise comparisons of DNA and RNA microbial communities between stand ages  
292 were performed (pairwise PERMANOVA, Table S3). The stand ages of *M. x giganteus* included  
293 were 2-, 3-, and 4-year-old, and the microbial community of each stand age was significantly  
294 different based on both DNA and RNA microbial communities ( $p_{\text{pairwisePERMANOVA}} < 0.05$ ). Similar  
295 patterns were observed for the response to N fertilization amount in both libraries, and both DNA  
296 and RNA microbial communities were found to have different microbial community compositions  
297 for three varying N fertilization amount ( $p_{\text{pairwisePERMANOVA}} < 0.05$ ). Pairwise comparison of DNA  
298 and RNA based on sampling day or the time since fertilization resulted in no significant differences  
299 observed in DNA, but significant differences between pre-fertilization (10 days before fertilization)  
300 and 69 days since fertilization in RNA (Table S4,  $p_{\text{pairwisePERMANOVA}} < 0.05$ ).

301

302 Table S3. Pairwise permutational multivariate analysis of variance (PERMANOVA) for  
303 comparing the effect of stand age and fertilization on the DNA and RNA microbial community  
304 dissimilarity.

305

306 Table S4. Pairwise permutational multivariate analysis of variance (PERMANOVA) for  
307 comparing the effect of time since fertilization on the DNA and RNA microbial community  
308 dissimilarity.

309

310 Stand age was consistently observed to explain the most variation between experimental  
311 factors, regardless of DNA or RNA methods (Table 1). We next evaluated if the specific phyla  
312 found to be different between stand ages was consistent between DNA and RNA microbial  
313 communities. A total of 20 identical phyla were detected in both sequencing libraries. Every  
314 phylum showed significant relative abundance differences between DNA and RNA ( $p_{\text{Kruskal-Wallis}}$   
315  $< 0.05$ ). The dominant phyla differed between DNA and RNA (Figure 6), with *Acidobacteria*  
316 ( $>17\%$ ), *Actinobacteria* ( $>24\%$ ), and *Proteobacteria* ( $>32\%$ ) dominant in DNA, and *Firmicutes*  
317 ( $>12\%$ ) and *Proteobacteria* ( $>43\%$ ) in RNA. We subsequently selected these phyla to evaluate  
318 genera level differences between DNA and RNA methods.

319

320 Figure 6. Phylum level differences in DNA and RNA microbial communities according to stand  
321 age differences. Relative abundances of annotated ASVs are shown, identified to their closest  
322 match in the RDP classifier. The letters “\*\*\*\*” denote significant differences of relative abundance  
323 between different stand ages of *M. x giganteus* at a p-value  $< 0.05$  as assessed by Kruskal-Wallis  
324 with post hoc Dunn’s test.

325

326 A total of 569 genera were detected among *Actinobacteria*, *Proteobacteria*, and *Firmicutes*  
327 and 308, 316, and 337 genera in 2-, 3-, and 4-year-old *M. x giganteus*, respectively, showed  
328 significant differences between the DNA and RNA microbial communities. We selected the genera

329 with greater than 0.1% relative abundance and compared differences between taxonomic profiles  
330 in DNA and RNA (Figure S2). Sequences associated with *Bacillus*, *Clostridium*, *Paenibacillus*,  
331 *Sporosarcina* of *Firmicutes* and *Bradyrhizobium*, *Methyloversatilis*, *Nitrosomonas*, *Nitrosospira*,  
332 and *Steroidobacter* of *Proteobacteria* were more enriched in RNA than in DNA. On the other hand,  
333 *Gaiella* and *Solirubrobacter* of *Actinobacteria* were more enriched in DNA.

334  
335 Figure S2. Comparison of dominant genus (> 0.1% relative abundance) in *Actinobacteria*,  
336 *Firmicutes*, and *Proteobacteria* between DNA and RNA microbial communities. (A) 4-year-old  
337 *M. x giganteus*, 73 genera. (B) 3-year-old *M. x giganteus*, 77 genera. (C) 2-year-old *M. x giganteus*,  
338 74 genera. All genera included this analysis were significantly different between DNA and RNA  
339 microbial communities ( $p_{\text{Kruskal-Wallis}} < 0.05$ ).

340  
341 Differences in response to fertilization were also observed between DNA and RNA  
342 microbial communities. Both DNA- and RNA-based methods identified that soil microbial  
343 communities showed different responses to N fertilization amount (Table 1, Table S3), though the  
344 phylogenetic profile observed under fertilized conditions differed based on the two methods  
345 (Figure S3). Overall, a greater number of phyla in RNA relative to DNA were significantly affected  
346 by differences in N fertilization amount (Table S5). Seven phyla in RNA (*Actinobacteria*,  
347 *Firmicutes*, *Gemmatimonadetes*, *Hydrogenedentes*, *Latescibacteria*, *Nitrospirae*, and  
348 *Proteobacteria*) showed significant differences between N fertilization amount differences  
349 compared to four phyla in DNA (*Acidobacteria*, *Chloroflexi*, *Latescibacteria*, and *Proteobacteria*).  
350 *Actinobacteria* (>26%) was more enriched in DNA microbial communities ( $p_{\text{Kruskal-Wallis}} < 0.05$ ),



351 and *Firmicutes* (>12%) and *Proteobacteria* (>47%) were significantly more enriched in RNA  
352 microbial communities ( $p_{\text{Kruskal-Wallis}} < 0.05$ ).

353

354 Figure S3. Phylum level differences in DNA and RNA microbial communities according to N  
355 fertilization amount differences. Relative abundances of annotated ASVs are shown, identified to  
356 their closest match in the RDP classifier. The letters “\*\*\*\*” denote significant differences of relative  
357 abundance between different stand age of *M. x giganteus* at a p-value < 0.05 as assess by Kruskal-  
358 Wallis with post hoc Dunn’s test.

359

360 Table S5. Kruskal-Wallis with post hoc Dunn’s test comparing the average relative abundances of  
361 phyla between DNA and RNA microbial communities by different amounts of N fertilization.  
362 Denote N0, N224, and N448 are N fertilization amount of 0 kg N ha<sup>-1</sup>, 224 kg N ha<sup>-1</sup>, and 448 kg  
363 N ha<sup>-1</sup>, respectively.

364

365 Genus-level analysis was performed on the *Actinobacteria*, *Firmicutes*, and *Proteobacteria*  
366 and among the 569 genera detected, 330, 323, and 309 genera showed significant differences  
367 between DNA and RNA microbial communities at N fertilization amount of 0, 224, and 448 kg N  
368 ha<sup>-1</sup>, respectively (Figure S4). Sequences associated with *Bacillus*, *Clostridium*, *Paenibacillus*,  
369 *Sporosarcina* of *Firmicutes* and *Bradyrhizobium*, *Methyloversatilis*, and *Nitrosomonas* of  
370 *Proteobacteria* more enriched in RNA than DNA. On the other hand, *Gaiella* from *Actinobacteria*  
371 and *Sphingomonas* of *Proteobacteria* were more abundant in DNA.

372

373 Figure S4. The dynamics of the 88 major genus (> 0.1% relative abundance) in the *Actinobacteria*,  
374 *Firmicutes*, and *Proteobacteria* between DNA and RNA microbial communities. (A) 0 kg N ha<sup>-1</sup>  
375 of fertilizer applied *M. x giganteus* soil including 79 genera. (B) 224 kg N ha<sup>-1</sup> of fertilizer applied  
376 *M. x giganteus* soil including 76 genera. (C) 448 kg N ha<sup>-1</sup> of fertilizer applied *M. x giganteus* soil  
377 including 74 genera. All genera included this analysis were significantly different between DNA  
378 and RNA microbial communities ( $p_{\text{Kruskal-Wallis}} < 0.05$ ).

379

380 **Taxa associated with nitrogen cycle-related bacteria showed a short-term response since**  
381 **fertilization only in RNA microbial communities.**

382 In comparing pre- and post-fertilization soil samples, differences in soil microbial  
383 communities were observed only in RNA libraries (Table 1, Table S4). Taxa that were  
384 significantly different before and since fertilization were associated with 10 phyla (Figure 7).  
385 Additionally, these differences were only observed 69 days since fertilization, where the relative  
386 abundances of *Acidobacteria*, *Armatimonadetes*, *Firmicutes*, and *Planctomycetes* were increased  
387 compared to before fertilization, and the relative abundances of *Actinobacteria*, *Bacteroidetes*,  
388 *Chloroflexi*, and *Latescibacteria* decreased.

389

390 Figure 7. Phylum-level responses to time since fertilization in RNA microbial communities. The  
391 average relative abundances of phyla over time since fertilization were summarized. Letters “\*\*\*\*”  
392 denote significant differences of relative abundance between pre- and 69 days since fertilization  
393 at a p-value < 0.05 as assess by Kruskal-Wallis with post hoc Dunn’s test.

394

395           The most enrichment since fertilization was observed in the *Firmicutes*, in which relative  
396 abundance was increased 10 folds, and *Planctomycetes* also increased by about 1.7 folds. These  
397 phyla are notable because they are known to contain known nitrogen cycling taxa (54, 55). To  
398 better explore the response to fertilization of nitrogen cycling taxa, we obtained taxa that are  
399 associated with nitrogen fixation, nitrification, and denitrification from the Fungene database.  
400 These taxa include 51 genera associated with *Firmicutes*, *Nitrospirae*, and *Planctomycetes*. We  
401 compared the differences of these genera between DNA and RNA libraries.

402           Overall, the total relative abundance of these genera comprised 1.18% and 8.51% in the  
403 DNA and RNA microbial communities, respectively (Figure 8). The large majority of these genera  
404 (with the exception of four genera) showed significant differences between DNA and RNA, and  
405 among them, *Bacillus*, *Paenibacillus*, and *Sporosarcina* were the most abundant (> 20%) in the  
406 RNA microbial community.

407

408           Figure 8. Comparison of nitrogen cycling-related bacteria in the DNA and RNA microbial  
409 communities. The average relative abundances of genus associated with nitrogen fixation,  
410 nitrification, and denitrification were summarized.

411

412           The taxa that showed distinct responses in RNA compared to DNA were classified by their  
413 known nitrogen cycling functions (excluding taxa with multiple functional annotations). Only taxa  
414 associated with denitrification in the RNA microbial communities showed a significant difference  
415 (Figure 9, Table S6) between pre- and post-fertilization, consistent with the observation that  
416 denitrifying bacteria were consistently enriched since fertilization (56).

417

418 Figure 9. Comparison of nitrogen cycling-related bacteria in the DNA and RNA microbial  
419 communities according to time since fertilization. The average relative abundances of bacteria  
420 associated with nitrogen fixation, nitrification, and denitrification function were summarized.

421

422 Table S6. Kruskal-Wallis with post hoc Dunn's test comparing the average relative abundances of  
423 nitrogen cycling functions in RNA microbial communities by time since fertilization.

424

## 425 **Discussion**

426

427 In direct comparisons of *M. x giganteus* soil microbiomes from DNA and RNA extractions,  
428 we found that the most significant factor in explaining variation between microbiomes was its  
429 sequencing library of origin, even more so than experimental factors of stand age, N fertilization  
430 amount, or sampling day (Table S1). DNA and RNA microbiomes also had significantly different  
431 alpha diversity, with increased diversity and less variation observed in DNA relative to RNA.  
432 These results are consistent with what is known about DNA and RNA. DNA represents the  
433 potential genes or membership that may be active and thus is expected to represent more diverse  
434 membership with the potential to become metabolically active. RNA, which is actively transcribed,  
435 represents growing members, and its higher variability is consistent with its dynamic responses.  
436 Previous studies have shown that the RNA microbial community may also have lower alpha  
437 diversity because it does not contain the sequences of dormant or dead cells and also has greater  
438 variability in response to the environment (47, 57–59).

439 Overall, the large majority of membership between DNA and RNA was shared (greater  
440 than 90%), suggesting that both methods identify the similar presence of taxa. The abundance of  
441 these shared taxa, however, could be significantly different between DNA and RNA, and most of

442 the shared taxa were more enriched in RNA. Based on the assumption that taxa observed in both  
443 methods are the most reliable, it is likely that DNA-based methods are underestimating the relative  
444 abundance of taxa. Further, these differences between DNA and RNA methods contributed to  
445 differences in estimated alpha diversity and varying observations of the microbial community  
446 response to plant host stand age and fertilization.

447 In response to both stand age and N fertilization amount, significant differences were  
448 observed in both DNA and RNA communities. While the overall pattern and ranking of differences  
449 were similar, the magnitude of this change and taxonomic membership driving these differences  
450 varied between DNA and RNA approaches. The most significant difference we observed in *M. x*  
451 *giganteus* soil microbial communities between the two library methods was in response to nitrogen  
452 fertilization. Only RNA microbial communities showed differences pre- and post-fertilization and  
453 only at day 69. RNA is able to show more rapid changes in response to changes in environmental  
454 conditions than DNA (60, 61), and here, we show the ability of RNA to capture a relatively short-  
455 term response over the course of one growing season in *M. x giganteus*, which is not observed in  
456 DNA. These results are consistent with RNA's short half-life of several minutes to several hours  
457 (62) and also justify its usage for measuring short-term seasonal responses in bioenergy soils. Our  
458 results showed that it was not until over two months that a response different to pre-fertilization  
459 conditions was observed in RNA, providing some insight into the metabolic response of soil  
460 microbes to fertilization in these soils.

461 Among the taxa which were found to be uniquely identified in RNA libraries were  
462 members associated with nitrogen-cycling, including members of *Firmicutes*, *Nitrospirae*, and  
463 *Planctomycetes* which were enriched with both the presence of fertilizer and increasing nitrogen  
464 fertilizer. These results are consistent with previous studies which have shown that *Firmicutes* are

465 enriched when nitrogen fertilizers are used (63–67). In the context of taxa associated with nitrogen  
466 cycling, it was confirmed that the RNA-based approach could better detect the denitrification  
467 function among the nitrogen cycling functions. This result is consistent with the results of previous  
468 studies that the application of nitrogen fertilizers suppressed the activity of nitrogen-fixing bacteria  
469 and enhanced denitrifying bacteria (56, 68). These results also emphasize that DNA may  
470 underestimate or miss the contribution of nitrogen-cycling taxa, which are highly relevant for  
471 nitrogen management in bioenergy systems. In addition to these taxa, we also found that members  
472 of dominant soil phyla, *Actinobacteria* and *Proteobacteria* are underestimated using DNA  
473 methods alone.

474 In summary, we found that DNA and RNA methods for characterizing the general response  
475 of microbial communities varied. With relevance to developing sustainable bioenergy crops and  
476 understanding the role of microbes in nutrient cycling, RNA appears to capture better the response  
477 of taxa known to be involved in nitrogen cycling and is also more sensitive to seasonal shifts in  
478 microbiomes. To better link microbial communities to ecosystem processes, we need to move  
479 towards characterizing the functional response of microbial communities. Due to costs, the first  
480 step in this characterization is often phylogenetic characterization of SSU genes based on DNA.  
481 Our results indicate that this method alone may bias against the composition results of the relevant  
482 microbial membership.

483 Notably, the integration of RNA-based methods into an experiment adds significant costs,  
484 requiring materials to quickly preserve samples for RNA extraction and typically more time for  
485 extraction and library preparation. RNA used for SSU characterization can be a complement to  
486 DNA-based studies, as it leverages the advantages and throughput of indicator gene amplification  
487 while not being as expensive as metatranscriptomics strategies. Based on our results, we

488 recommended that DNA can be used for the initial and broad characterization of community  
489 membership. The use of RNA for SSU characterization could be used to complement DNA  
490 characterization when experimental questions have been developed. In the context of our  
491 experiment, DNA-based analyses were used to validate that there was a significant response to  
492 stand age and fertilization. RNA-based analyses were more helpful in identifying the specific taxa  
493 that respond to fertilization. With these specific taxa now identified, future research will be focused  
494 on functional characterization, guided by the result of this study (e.g., microbial responses to  
495 fertilization responses are most significant two months since fertilization). More broadly, in our  
496 understanding of microbial ecology, increasing numbers of studies are identifying the  
497 environments or gradients for which microbial communities are changing. In future work, it will  
498 be necessary to emphasize which taxa or what functions are changing, and our results indicate that  
499 RNA-based SSU characterization may be a substantial resource.

500

## 501 **Acknowledgments**

502

503 This work was funded by the DOE Center for Advanced Bioenergy and Bioproducts  
504 Innovation (U.S. Department of Energy, Office of Science, Office of Biological and  
505 Environmental Research under Award Number DE-SC0018420). Any opinions, findings, and  
506 conclusions or recommendations expressed in this publication are those of the author(s) and do  
507 not necessarily reflect the views of the U.S. Department of Energy.

508

## 509 **Reference**

510

- 511 1. Lewandowski I, Clifton-Brown JC, Scurlock JMO, Huisman W. 2000. Miscanthus:  
512 European experience with a novel energy crop. *Biomass and Bioenergy* 19:209–227.

- 513 2. Heaton EA, Dohleman FG, Miguez AF, Juvik JA, Lozovaya V, Widholm J, Zabolina OA,  
514 McIsaac GF, David MB, Voigt TB, Boersma NN, Long SP. 2010. Chapter 3 - Miscanthus:  
515 A Promising Biomass Crop, p. 75–137. *In* Kader, J-C, Delseny, M (eds.), . Academic  
516 Press.
- 517 3. Jørgensen U. 2011. Benefits versus risks of growing biofuel crops: The case of  
518 Miscanthus. *Current Opinion in Environmental Sustainability*.
- 519 4. Brosse N, Dufour A, Meng X, Sun Q, Ragauskas A. 2012. Miscanthus: A fast-growing  
520 crop for biofuels and chemicals production. *Biofuels, Bioproducts and Biorefining* 6:580–  
521 598.
- 522 5. Heaton EA, Dohleman FG, Long SP. 2008. Meeting US biofuel goals with less land: The  
523 potential of Miscanthus. *Global Change Biology* 14:2000–2014.
- 524 6. Boehmel C, Lewandowski I, Claupein W. 2008. Comparing annual and perennial energy  
525 cropping systems with different management intensities. *Agricultural Systems* 96:224–  
526 236.
- 527 7. Lewandowski I, Schmidt U. 2006. Nitrogen, energy and land use efficiencies of  
528 miscanthus, reed canary grass and triticale as determined by the boundary line approach.  
529 *Agriculture, Ecosystems and Environment* 112:335–346.
- 530 8. Schwarz H, Liebhard P, Ehrendorfer K, Ruckenbauer P. 1994. The effect of fertilization  
531 on yield and quality of *Miscanthus sinensis* “Giganteus.” *Industrial Crops and Products*  
532 2:153–159.
- 533 9. Lewandowski I, Heinz A. 2003. Delayed harvest of miscanthus - Influences on biomass  
534 quantity and quality and environmental impacts of energy production. *European Journal of*  
535 *Agronomy* 19:45–63.



- 536 10. Di HJ, Cameron KC. 2002. Nitrate leaching in temperate agroecosystems: Sources, factors  
537 and mitigating strategies. *Nutrient Cycling in Agroecosystems* 64:237–256.
- 538 11. Christian DG, Riche AB. 1998. Nitrate leaching losses under *Miscanthus* grass planted on  
539 a silty clay loam soil. *Soil Use and Management* 14:131–135.
- 540 12. Heaton EA, Clifton-Brown J, Voigt TB, Jones MB, Long SP. 2004. *Miscanthus* for  
541 renewable energy generation: European Union experience and projections for Illinois.  
542 *Mitigation and Adaptation Strategies for Global Change* 9:433–451.
- 543 13. Styles D, Thorne F, Jones MB. 2008. Energy crops in Ireland: An economic comparison  
544 of willow and *Miscanthus* production with conventional farming systems. *Biomass and*  
545 *Bioenergy* 32:407–421.
- 546 14. Witzel CP, Finger R. 2016. Economic evaluation of *Miscanthus* production - A review.  
547 *Renewable and Sustainable Energy Reviews* 53:681–696.
- 548 15. Arnoult S, Brancourt-Hulmel M. 2015. A Review on *Miscanthus* Biomass Production and  
549 Composition for Bioenergy Use: Genotypic and Environmental Variability and  
550 Implications for Breeding. *Bioenergy Research* 8:502–526.
- 551 16. Clifton-Brown JC, Lewandowski I, Andersson B, Basch G, Christian DG, Kjeldsen JB,  
552 Jørgensen U, Mortensen J v., Riche AB, Schwarz KU, Tayebi K, Teixeira F. 2001.  
553 Performance of 15 *Miscanthus* genotypes at five sites in Europe. *Agronomy Journal*  
554 93:1013–1019.
- 555 17. McIsaac GF, David MB, Mitchell CA. 2010. *Miscanthus* and Switchgrass Production in  
556 Central Illinois: Impacts on Hydrology and Inorganic Nitrogen Leaching. *Journal of*  
557 *Environmental Quality* 39:1790–1799.

- 558 18. Cosentino SL, Patanè C, Sanzone E, Copani V, Foti S. 2007. Effects of soil water content  
559 and nitrogen supply on the productivity of *Miscanthus × giganteus* Greef et Deu. in a  
560 Mediterranean environment. *Industrial Crops and Products* 25:75–88.
- 561 19. Christian DG, Riche AB, Yates NE. 2008. Growth, yield and mineral content of  
562 *Miscanthus × giganteus* grown as a biofuel for 14 successive harvests. *Industrial Crops*  
563 *and Products* 28:320–327.
- 564 20. Jezowski S. 2008. Yield traits of six clones of *Miscanthus* in the first 3 years following  
565 planting in Poland. *Industrial Crops and Products* 27:65–68.
- 566 21. Jezowski S, Głowacka K, Kaczmarek Z. 2011. Variation on biomass yield and  
567 morphological traits of energy grasses from the genus *Miscanthus* during the first years of  
568 crop establishment. *Biomass and Bioenergy* 35:814–821.
- 569 22. Amougou N, Bertrand I, Machet JM, Recous S. 2011. Quality and decomposition in soil  
570 of rhizome, root and senescent leaf from *Miscanthus x giganteus*, as affected by harvest  
571 date and N fertilization. *Plant and Soil* 338:83–97.
- 572 23. Gauder M, Graeff-Hönninger S, Lewandowski I, Claupein W. 2012. Long-term yield and  
573 performance of 15 different *Miscanthus* genotypes in southwest Germany. *Annals of*  
574 *Applied Biology* 160:126–136.
- 575 24. McLaughlin SB, Kszos LA. 2005. Development of switchgrass (*Panicum virgatum*) as a  
576 bioenergy feedstock in the United States. *Biomass and Bioenergy* 28:515–535.
- 577 25. Lesur C, Jeuffroy MH, Makowski D, Riche AB, Shield I, Yates N, Fritz M, Formowitz B,  
578 Grunert M, Jorgensen U, Laerke PE, Loyce C. 2013. Modeling long-term yield trends of  
579 *Miscanthus×giganteus* using experimental data from across Europe. *Field Crops Research*  
580 149:252–260.

- 581 26. Thompson KA, Deen B, Dunfield KE. 2016. Soil denitrifier community size changes with  
582 land use change to perennial bioenergy cropping systems. *SOIL* 2:523–535.
- 583 27. Li D, Voigt TB, Kent AD. 2016. Plant and soil effects on bacterial communities  
584 associated with *Miscanthus × giganteus* rhizosphere and rhizomes. *GCB Bioenergy*  
585 8:183–193.
- 586 28. Tejera M, Boersma N, Vanlooche A, Archontoulis S, Dixon P, Miguez F, Heaton E. 2019.  
587 Multi-year and Multi-site Establishment of the Perennial Biomass Crop *Miscanthus ×*  
588 *giganteus* Using a Staggered Start Design to Elucidate N Response. *Bioenergy Research*  
589 12:471–483.
- 590 29. Miguez FE, Villamil MB, Long SP, Bollero GA. 2008. Meta-analysis of the effects of  
591 management factors on *Miscanthus × giganteus* growth and biomass production.  
592 *Agricultural and Forest Meteorology* 148:1280–1292.
- 593 30. Cadoux S, Riche AB, Yates NE, Machet JM. 2012. Nutrient requirements of *Miscanthus x*  
594 *giganteus*: Conclusions from a review of published studies. *Biomass and Bioenergy*  
595 38:14–22.
- 596 31. Wang D, Maughan MW, Sun J, Feng X, Miguez F, Lee D, Dietze MC. 2012. Impact of  
597 nitrogen allocation on growth and photosynthesis of *Miscanthus* (*Miscanthus ×*  
598 *giganteus*). *GCB Bioenergy* 4:688–697.
- 599 32. Arundale RA, Dohleman FG, Voigt TB, Long SP. 2014. Nitrogen Fertilization Does  
600 Significantly Increase Yields of Stands of *Miscanthus × giganteus* and *Panicum virgatum*  
601 in Multiyear Trials in Illinois. *Bioenergy Research* 7:408–416.

- 602 33. Lee MS, Wycislo A, Guo J, Lee DK, Voigt T. 2017. Nitrogen fertilization effects on  
603 biomass production and yield components of miscanthus × giganteus. *Frontiers in Plant*  
604 *Science* 8:544.
- 605 34. Finnan J, Burke B. 2016. Nitrogen fertilization of *Miscanthus x giganteus*: effects on  
606 nitrogen uptake, growth, yield and emissions from biomass combustion. *Nutrient Cycling*  
607 *in Agroecosystems* 106:249–256.
- 608 35. Monti A, Zegada-Lizarazu W, Zanetti F, Casler M. 2019. Nitrogen Fertilization  
609 Management of Switchgrass, *Miscanthus* and Giant Reed: A Review, p. 87–119. *In*  
610 *Advances in Agronomy*.
- 611 36. Keymer DP, Kent AD. 2014. Contribution of nitrogen fixation to first year *Miscanthus* ×  
612 *giganteus*. *GCB Bioenergy* 6:577–586.
- 613 37. Davis SC, Parton WJ, Dohleman FG, Smith CM, del Grosso S, Kent AD, DeLucia EH.  
614 2010. Comparative biogeochemical cycles of bioenergy crops reveal nitrogen-fixation and  
615 low greenhouse gas emissions in a *Miscanthus* × *giganteus* agro-ecosystem. *Ecosystems*  
616 13:144–156.
- 617 38. Mao Y, Yannarell AC, Davis SC, Mackie RI. 2013. Impact of different bioenergy crops  
618 on N-cycling bacterial and archaeal communities in soil. *Environmental Microbiology*  
619 15:928–942.
- 620 39. Jiaron Guo. 2016. Rhizosphere metagenomics of three biofuel crops.
- 621 40. Liu Y, Ludewig U. 2019. Nitrogen-dependent bacterial community shifts in root, rhizome  
622 and rhizosphere of nutrient-efficient *Miscanthus x giganteus* from long-term field trials.  
623 *GCB Bioenergy* 11:1334–1347.

- 624 41. Ma L, Rocha FI, Lee J, Choi J, Tejera M, Sooksa-Nguan T, Boersma N, VanLoocke A,  
625 Heaton E, Howe A. 2021. The impact of stand age and fertilization on the soil microbiome  
626 of miscanthus × giganteus. *Phytobiomes Journal* 5:51–59.
- 627 42. Papp K, Hungate BA, Schwartz E. 2018. Microbial rRNA synthesis and growth compared  
628 through quantitative stable isotope probing with H<sub>2</sub><sup>18</sup>O. *Applied and Environmental*  
629 *Microbiology* 84:e02441-17.
- 630 43. Dlott G, Maul JE, Buyer J, Yarwood S. 2015. Microbial rRNA: RDNA gene ratios may be  
631 unexpectedly low due to extracellular DNA preservation in soils. *Journal of*  
632 *Microbiological Methods* 115:112–120.
- 633 44. Broughton LC, Gross KL. 2000. Patterns of diversity in plant and soil microbial  
634 communities along a productivity gradient in a Michigan old-field. *Oecologia* 125:420–  
635 427.
- 636 45. Freedman ZB, Romanowicz KJ, Upchurch RA, Zak DR. 2015. Differential responses of  
637 total and active soil microbial communities to long-term experimental N deposition. *Soil*  
638 *Biology and Biochemistry* 90:275–282.
- 639 46. Lennon JT, Jones SE. 2011. Microbial seed banks: the ecological and evolutionary  
640 implications of dormancy. *Nature Reviews Microbiology* 9:119–130.
- 641 47. Baldrian P, Kolařík M, Štursová M, Kopecký J, Valášková V, Větrovský T, Žifčáková L,  
642 Šnajdr J, Rídl J, Vlček Č, Voříšková J. 2012. Active and total microbial communities in  
643 forest soil are largely different and highly stratified during decomposition. *The ISME*  
644 *Journal* 6:248–258.

- 645 48. Zhang Y, Zhao Z, Dai M, Jiao N, Herndl GJ. 2014. Drivers shaping the diversity and  
646 biogeography of total and active bacterial communities in the South China Sea. *Molecular*  
647 *Ecology* 23:2260–2274.
- 648 49. Videira SS, Pereira e Silva M de C, de Souza Galisa P, Dias ACF, Nissinen R, Divan  
649 VLB, van Elsas JD, Baldani JJ, Salles JF. 2013. Culture-independent molecular  
650 approaches reveal a mostly unknown high diversity of active nitrogen-fixing bacteria  
651 associated with *Pennisetum purpureum*—a bioenergy crop. *Plant and Soil* 373:737–754.
- 652 50. Studt JE, McDaniel MD, Tejera MD, VanLoocke A, Howe A, Heaton EA. 2021. Soil net  
653 nitrogen mineralization and leaching under *Miscanthus × giganteus* and *Zea mays*. *GCB*  
654 *Bioenergy* 13:1545–1560.
- 655 51. Chowdary D, Lathrop J, Skelton J, Curtin K, Briggs T, Zhang Y, Yu J, Wang Y,  
656 Mazumder A. 2006. Prognostic gene expression signatures can be measured in tissues  
657 collected in RNAlater preservative. *Journal of Molecular Diagnostics* 8:31–39.
- 658 52. Parada AE, Needham DM, Fuhrman JA. 2016. Every base matters: Assessing small  
659 subunit rRNA primers for marine microbiomes with mock communities, time series and  
660 global field samples. *Environmental Microbiology* 18:1403–14.
- 661 53. Apprill A, McNally S, Parsons R, Weber L. 2015. Minor revision to V4 region SSU rRNA  
662 806R gene primer greatly increases detection of SAR11 bacterioplankton. *Aquatic*  
663 *Microbial Ecology* 75:129–137.
- 664 54. Delmont TO, Quince C, Shaiber A, Esen ÖC, Lee STM, Rappé MS, McLellan SL, Lückner  
665 S, Eren AM. 2018. Nitrogen-fixing populations of Planctomycetes and Proteobacteria are  
666 abundant in surface ocean metagenomes. *Nature Microbiology* 3:804–813.

- 667 55. Ren C, Zhang W, Zhong ZK, Han X, Yang G, Feng Y, Ren G. 2018. Differential  
668 responses of soil microbial biomass, diversity, and compositions to altitudinal gradients  
669 depend on plant and soil characteristics. *Science of the Total Environment* 610–611:750–  
670 758.
- 671 56. Knowles R. 1982. Denitrification. *Microbiological reviews* 46:43–70.
- 672 57. Li R, Tun HM, Jahan M, Zhang Z, Kumar A, Fernando D, Farenhorst A, Khafipour E.  
673 2017. Comparison of DNA-, PMA-, and RNA-based 16S rRNA Illumina sequencing for  
674 detection of live bacteria in water. *Scientific Reports* 7:5752.
- 675 58. de Vrieze J, Pinto AJ, Sloan WT, Ijaz UZ. 2018. The active microbial community more  
676 accurately reflects the anaerobic digestion process: 16S rRNA (gene) sequencing as a  
677 predictive tool. *Microbiome* 6:63.
- 678 59. Prussin AJ, Torres PJ, Shimashita J, Head SR, Bibby KJ, Kelley ST, Marr LC. 2019.  
679 Seasonal dynamics of DNA and RNA viral bioaerosol communities in a daycare center.  
680 *Microbiome* 7:53.
- 681 60. Bulow FJ. 1970. RNA–DNA Ratios as Indicators of Recent Growth Rates of a Fish.  
682 *Journal of the Fisheries Research Board of Canada* 27:2343–2349.
- 683 61. Eichler S, Christen R, Höltje C, Westphal P, Bötzel J, Brettar I, Mehling A, Höfle MG.  
684 2006. Composition and dynamics of bacterial communities of a drinking water supply  
685 system as assessed by RNA- and DNA-based 16S rRNA gene fingerprinting. *Applied and*  
686 *Environmental Microbiology* 72:1858–1872.
- 687 62. Deana A, Belasco JG. 2005. Lost in translation: The influence of ribosomes on bacterial  
688 mRNA decay. *Genes and Development* 19:2526–2533.

- 689 63. Smercina DN, Evans SE, Friesen ML, Tiemann LK. 2019. To fix or not to fix: Controls  
690 on free-living nitrogen fixation in the rhizosphere. *Applied and Environmental*  
691 *Microbiology* 85:e02546-18.
- 692 64. Li JG, Shen MC, Hou JF, Li L, Wu JX, Dong YH. 2016. Effect of different levels of  
693 nitrogen on rhizosphere bacterial community structure in intensive monoculture of  
694 greenhouse lettuce. *Scientific Reports* 6:25305.
- 695 65. Zhou J, Guan D, Zhou B, Zhao B, Ma M, Qin J, Jiang X, Chen S, Cao F, Shen D, Li J.  
696 2015. Influence of 34-years of fertilization on bacterial communities in an intensively  
697 cultivated black soil in northeast China. *Soil Biology and Biochemistry* 90:42–51.
- 698 66. Wagner M, Horn M. 2006. The Planctomycetes, Verrucomicrobia, Chlamydiae and sister  
699 phyla comprise a superphylum with biotechnological and medical relevance. *Current*  
700 *Opinion in Biotechnology* 17:241–249.
- 701 67. Leff JW, Jones SE, Prober SM, Barberán A, Borer ET, Firm JL, Harpole WS, Hobbie SE,  
702 Hofmockel KS, Knops JMH, McCulley RL, la Pierre K, Risch AC, Seabloom EW, Schütz  
703 M, Steenbock C, Stevens CJ, Fierer N. 2015. Consistent responses of soil microbial  
704 communities to elevated nutrient inputs in grasslands across the globe. *Proceedings of the*  
705 *National Academy of Sciences of the United States of America* 112:10967–10972.
- 706 68. Thompson KA, Deen B, Dunfield KE. 2018. Impacts of surface-applied residues on N-  
707 cycling soil microbial communities in miscanthus and switchgrass cropping systems.  
708 *Applied Soil Ecology* 130:79–83.

709

710



711

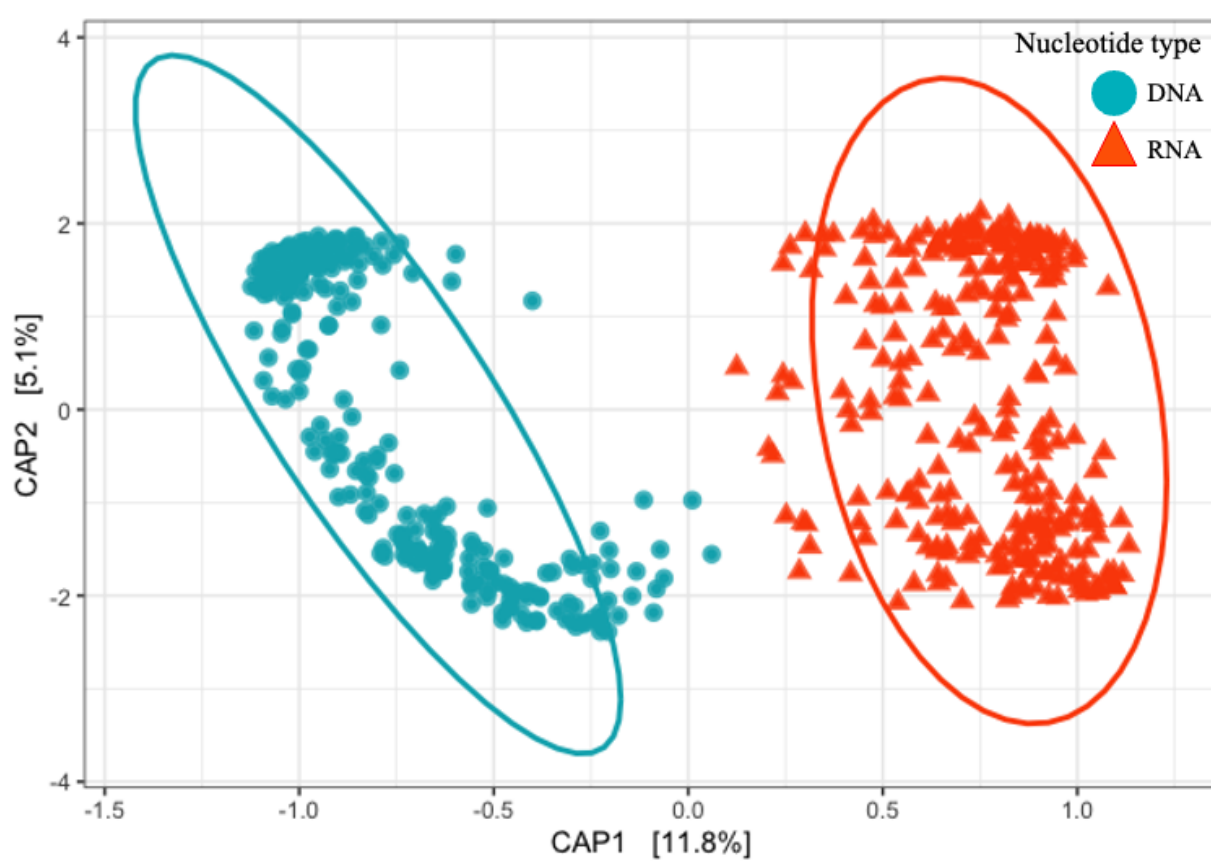

712

713 Figure 1. Similarities, assessed with Bray-Curtis indices, between DNA and RNA microbial  
714 communities from *M. x giganteus* soils. Constrained analysis of principal coordinates (CAP) was  
715 used to ordinate Bray-Curtis indices calculated with ASVs. Blue dot and red triangle represent the  
716 DNA and RNA microbial communities, respectively.

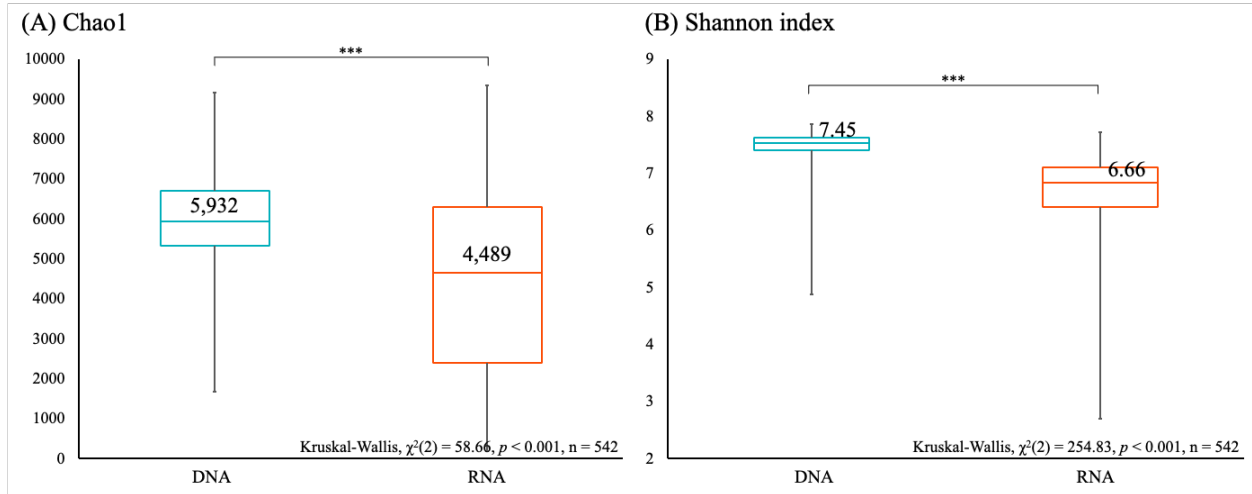

717

718 Figure 2. Alpha diversity indices of DNA and RNA microbial communities. Richness ((A)

719 Chao1, (B) Shannon index) were estimated for microbial communities with ASVs. Letters “\*\*\*”

720 denote significant differences of alpha diversity indices between DNA and RNA microbial

721 communities at a p-value < 0.05 as assess by Kruskal-Wallis with post hoc Dunn’s test.

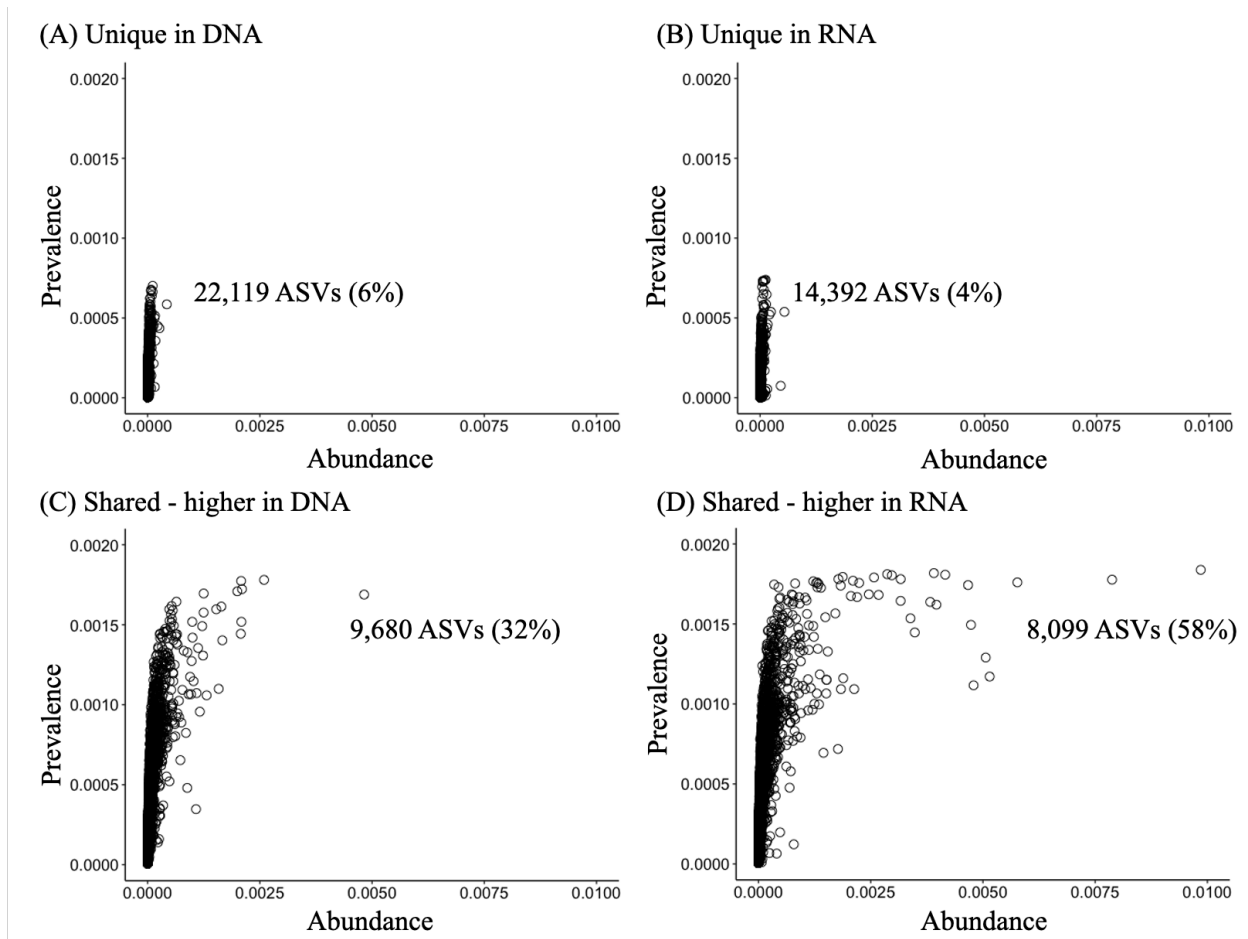

722

723 Figure 3. Abundance-occupancy comparison of ASVs in the DNA and RNA microbial  
724 communities. Abundance-occupancy distributions were assessed to identify the dynamics of the  
725 DNA and RNA microbial community memberships. Each point is an ASV. The ASVs were  
726 classified as (A) unique in DNA or (B) unique in RNA, respectively, when it was detected only in  
727 the DNA or RNA microbial communities. ASVs detected in both DNA and RNA microbial  
728 communities were classified as "shared" and further classified by the average relative abundance  
729 based on its enrichment in (C) DNA or (D) RNA.

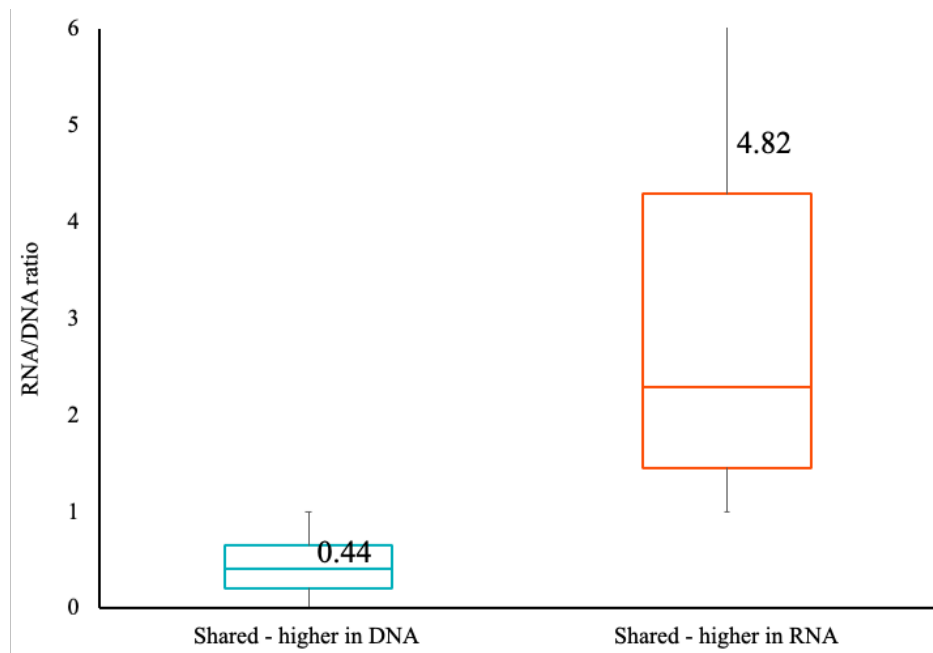

730

731 Figure 4. RNA/DNA ratio comparison of the shared ASVs. The ratio of average relative abundance  
732 in DNA and RNA microbial communities of ASVs detected in both microbial communities was  
733 compared to identify the biased in the DNA and RNA-based microbial community analysis results.  
734 Shared - higher in DNA (blue) and Shared - higher in RNA (red).

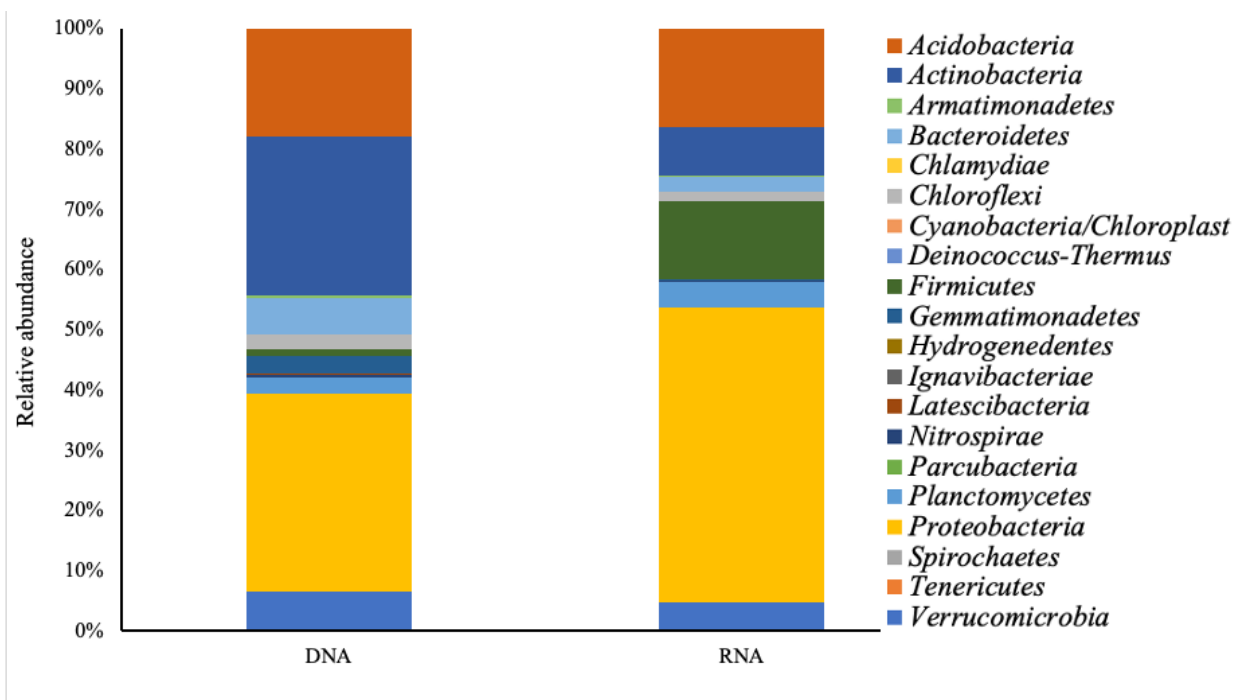

735

736 Figure 5. Phylum level differences in DNA and RNA microbial communities. Relative abundances  
737 of annotated ASVs are shown, identified to their closest match in the RDP classifier. See  
738 Supplementary Table 2 for a different perspective on the dynamics of numerical relative  
739 abundance.

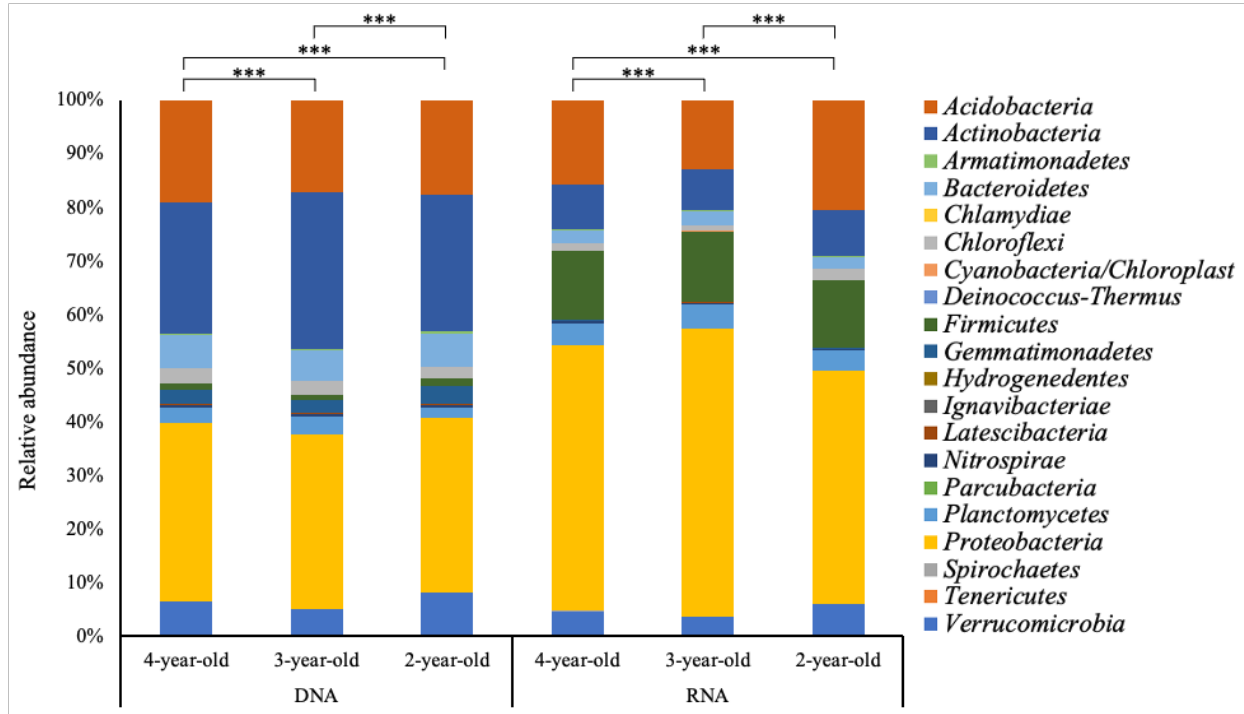

741 Figure 6. Phylum level differences in DNA and RNA microbial communities according to stand  
742 age differences. Relative abundances of annotated ASVs are shown, identified to their closest  
743 match in the RDP classifier. The letters “\*\*\*” denote significant differences of relative abundance  
744 between different stand ages of *M. x giganteus* at a p-value < 0.05 as assessed by Kruskal-Wallis  
745 with post hoc Dunn’s test.

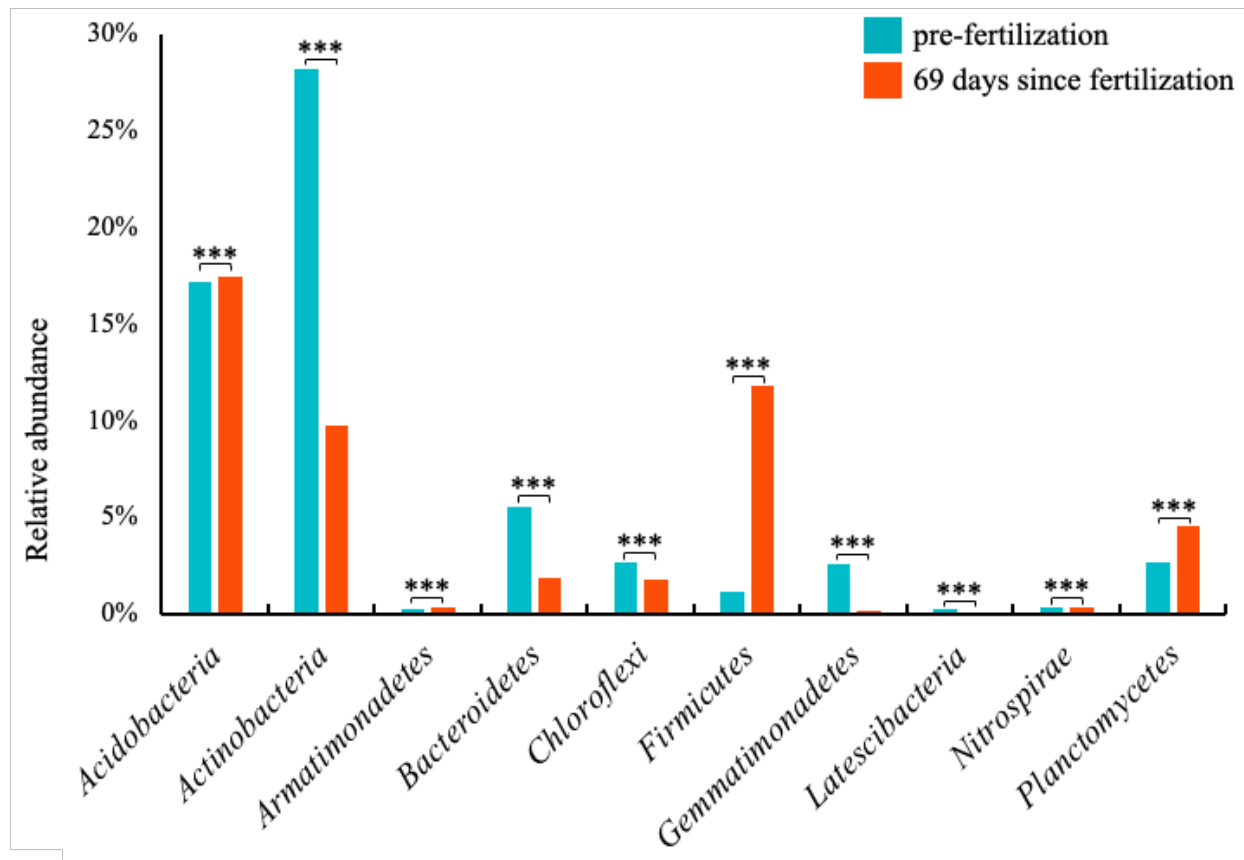

746

747 Figure 7. Phylum-level responses to time since fertilization in RNA microbial communities. The  
748 average relative abundances of phyla over time since fertilization were summarized. Letters “\*\*\*”  
749 denote significant differences of relative abundance between pre- and 69 days since fertilization  
750 at a p-value < 0.05 as assessed by Kruskal-Wallis with post hoc Dunn’s test.

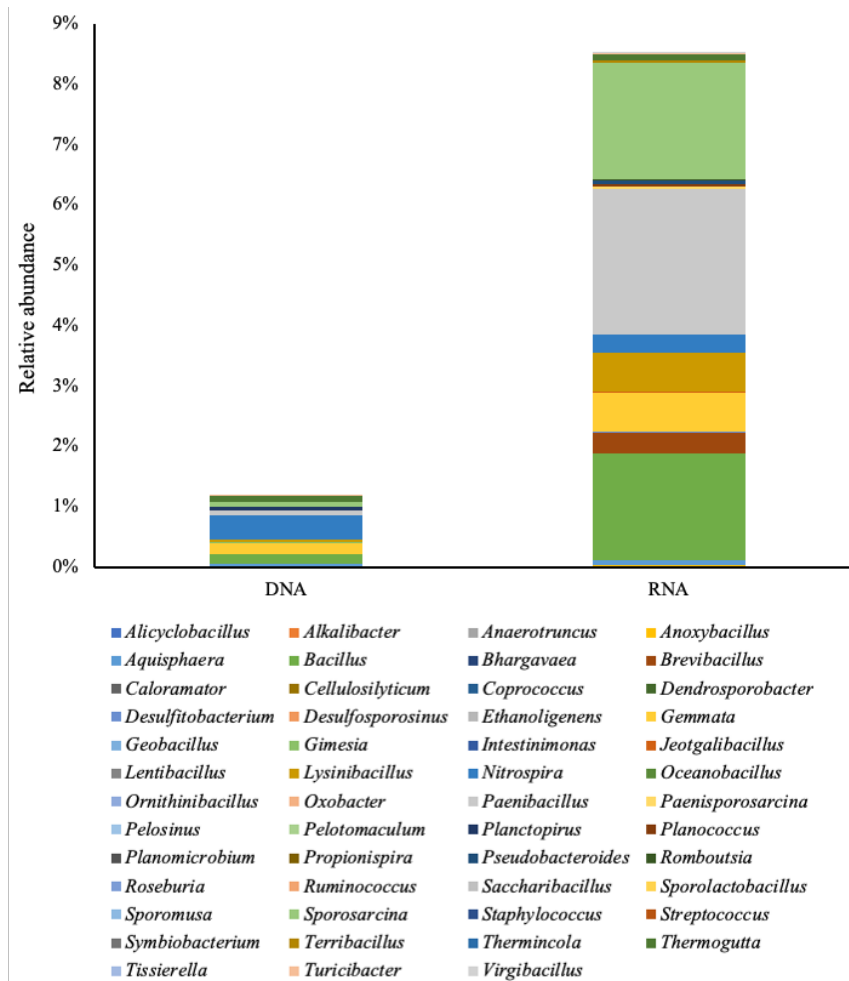

751

752 Figure 8. Comparison of nitrogen cycling-related bacteria in the DNA and RNA microbial  
 753 communities. The average relative abundances of genus associated with nitrogen fixation,  
 754 nitrification, and denitrification were summarized.



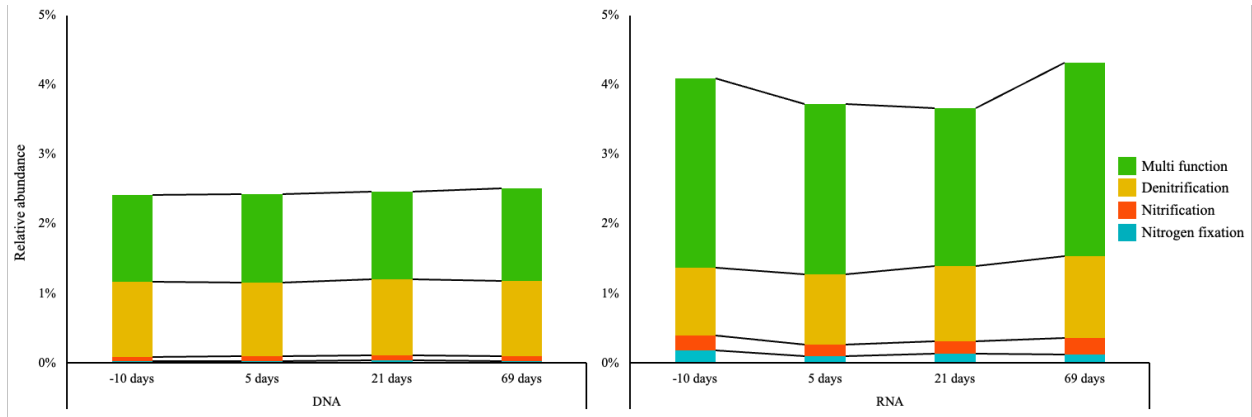

755

756 Figure 9. Comparison of nitrogen cycling-related bacteria in the DNA and RNA microbial  
757 communities according to time since fertilization. The average relative abundances of bacteria  
758 associated with nitrogen fixation, nitrification, and denitrification function were summarized.

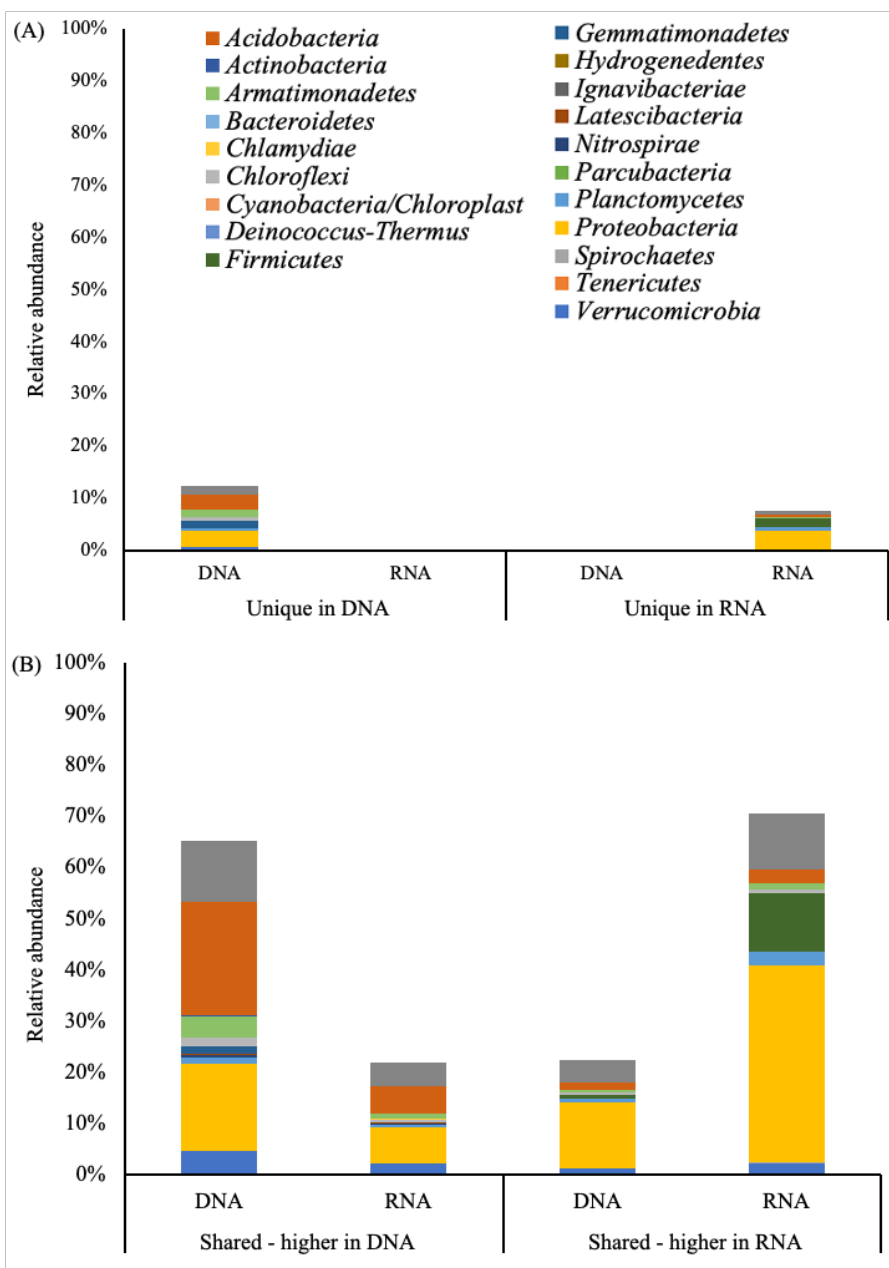

759

760 Figure S1. Phylum level differences in DNA and RNA microbial communities based on unique  
 761 ASVs in DNA or RNA only (A) or shared ASVs and their enrichment in either DNA or RNA (B).  
 762 Relative abundances of annotated ASVs are shown, identified to their closest match in the RDP  
 763 classifier.

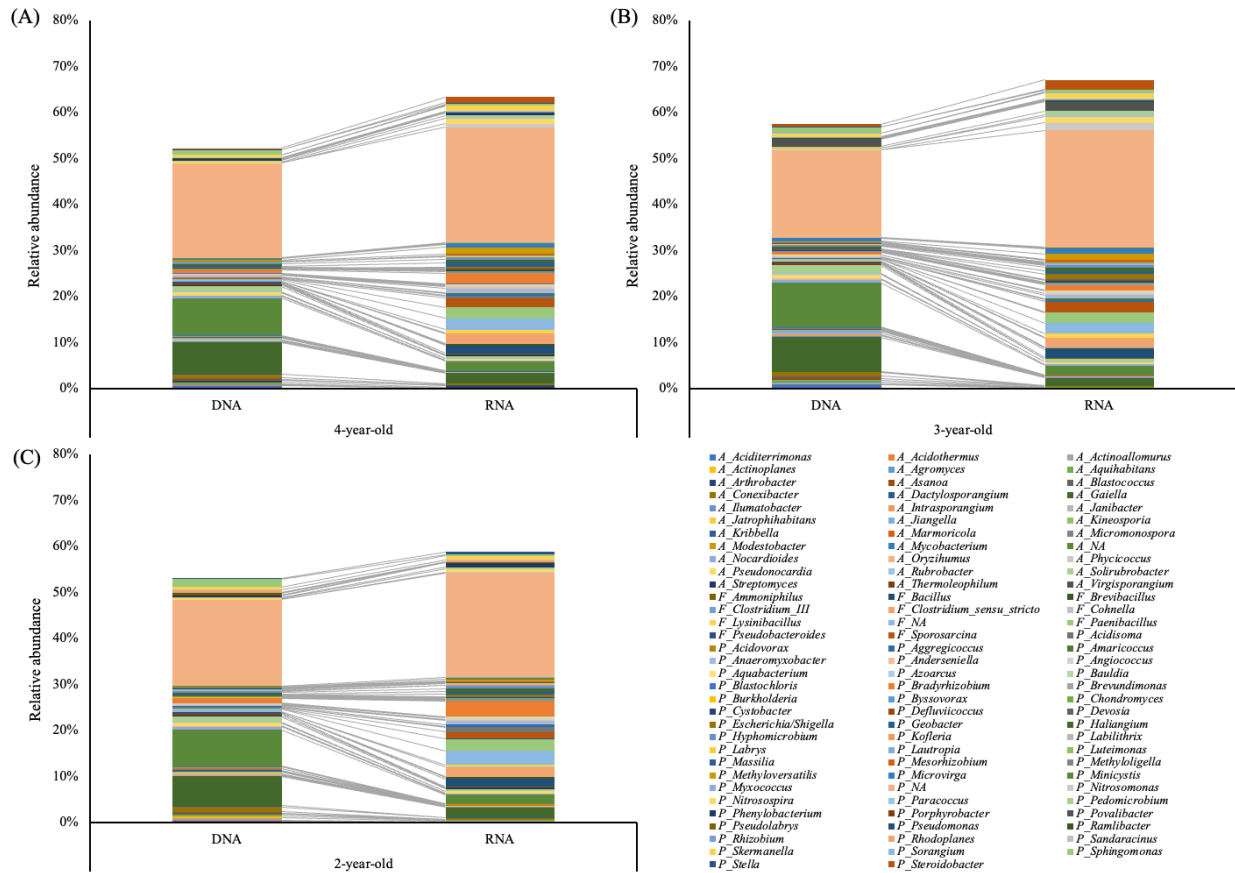

764

765 Figure S2. Comparison of dominant genus (> 0.1% relative abundance) in *Actinobacteria*,  
 766 *Firmicutes*, and *Proteobacteria* between DNA and RNA microbial communities. (A) 4-year-old  
 767 *M. x giganteus*, 73 genera. (B) 3-year-old *M. x giganteus*, 77 genera. (C) 2-year-old *M. x giganteus*,  
 768 74 genera. All genera included this analysis were significantly different between DNA and RNA  
 769 microbial communities ( $p_{\text{Kruskal-Wallis}} < 0.05$ ).

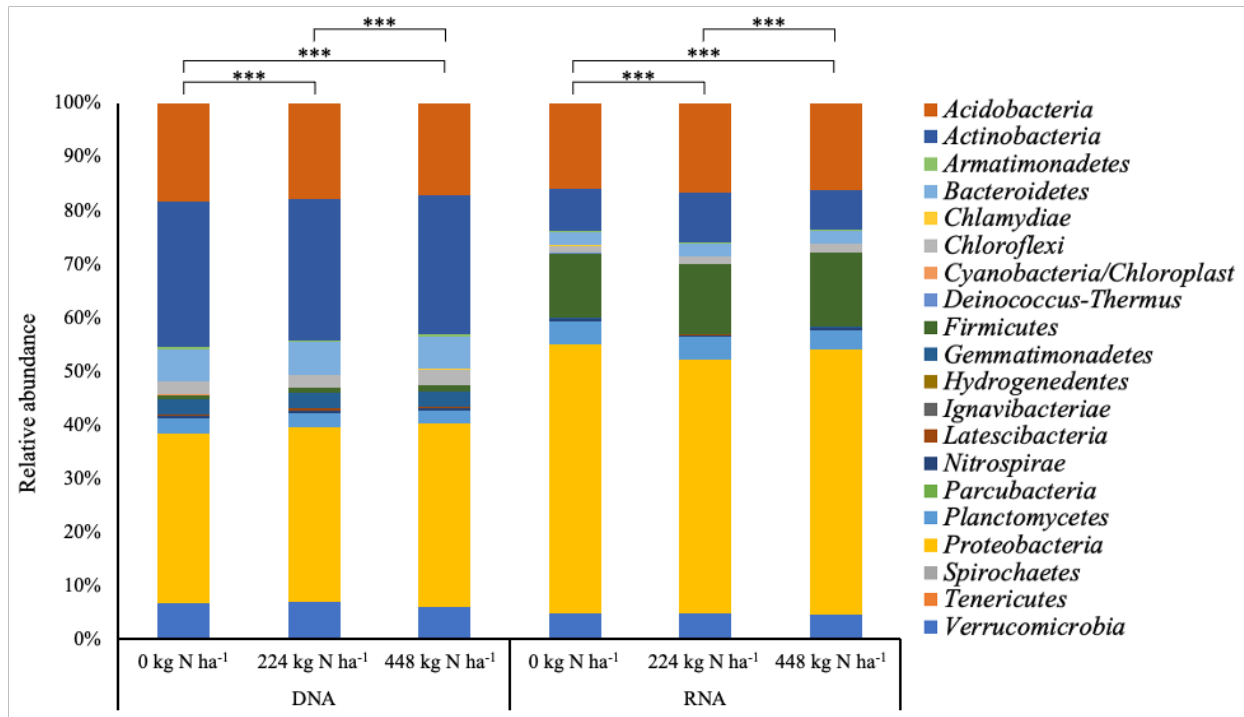

770

771 Figure S3. Phylum level differences in DNA and RNA microbial communities according to N  
772 fertilization amount differences. Relative abundances of annotated ASVs are shown, identified to  
773 their closest match in the RDP classifier. The letters “\*\*\*” denote significant differences of relative  
774 abundance between different stand age of *M. x giganteus* at a p-value < 0.05 as assess by Kruskal-  
775 Wallis with post hoc Dunn’s test.

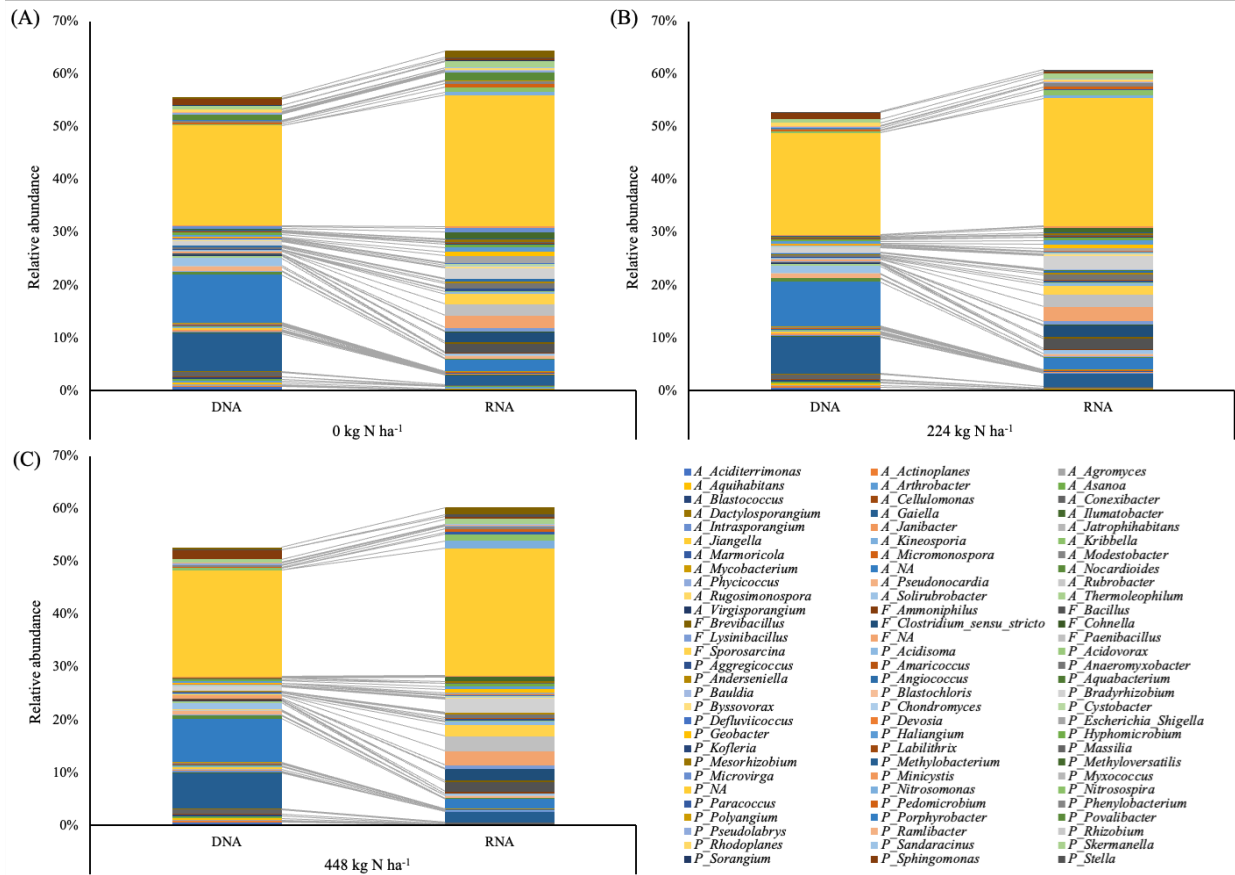

Figure S4. The dynamics of the 88 major genus (> 0.1% relative abundance) in the *Actinobacteria*, *Firmicutes*, and *Proteobacteria* between DNA and RNA microbial communities. (A) 0 kg N ha<sup>-1</sup> of fertilizer applied *M. x giganteus* soil including 79 genera. (B) 224 kg N ha<sup>-1</sup> of fertilizer applied *M. x giganteus* soil including 76 genera. (C) 448 kg N ha<sup>-1</sup> of fertilizer applied *M. x giganteus* soil including 74 genera. All genera included this analysis were significantly different between DNA and RNA microbial communities ( $p_{\text{Kruskal-Wallis}} < 0.05$ ).

783 Table 1. Permutational multivariate analysis of variance (PERMANOVA) for comparing DNA  
784 and RNA microbial community dissimilarity.

| Response variable       | Stand age                                                          | N fertilization amount                                             | Time since fertilization                                           | Fertilization history                                            |
|-------------------------|--------------------------------------------------------------------|--------------------------------------------------------------------|--------------------------------------------------------------------|------------------------------------------------------------------|
| DNA microbial community | $R^2_{\text{PERMANOVA}}$ : 0.051<br>$p_{\text{PERMANOVA}}$ : 0.001 | $R^2_{\text{PERMANOVA}}$ : 0.015<br>$p_{\text{PERMANOVA}}$ : 0.002 | $R^2_{\text{PERMANOVA}}$ : 0.005<br>$p_{\text{PERMANOVA}}$ : n.s   | $R^2_{\text{PERMANOVA}}$ : 0.003<br>$p_{\text{PERMANOVA}}$ : n.s |
| RNA microbial community | $R^2_{\text{PERMANOVA}}$ : 0.037<br>$p_{\text{PERMANOVA}}$ : 0.001 | $R^2_{\text{PERMANOVA}}$ : 0.009<br>$p_{\text{PERMANOVA}}$ : 0.007 | $R^2_{\text{PERMANOVA}}$ : 0.010<br>$p_{\text{PERMANOVA}}$ : 0.008 | $R^2_{\text{PERMANOVA}}$ : 0.005<br>$p_{\text{PERMANOVA}}$ : n.s |

785

786 Table S1. Comparison of microbial community dissimilarity using permutational multivariate  
787 analysis of variance (PERMANOVA) for bacterial communities in *M. x giganteus* soil samples.

| Response variable                                                  | Dissimilarity                                                         |
|--------------------------------------------------------------------|-----------------------------------------------------------------------|
| Nucleic Acid<br>(DNA and RNA)                                      | $R^2_{\text{PERMANOVA}}: 0.117$<br>$p_{\text{PERMANOVA}}: 0.001$      |
| Stand ages<br>(2, 3, or 4-year-old)                                | $R^2_{\text{PERMANOVA}}: 0.030$<br>$p_{\text{PERMANOVA}}: 0.001$      |
| N fertilization amount<br>(0, 224, and 448 kg N ha <sup>-1</sup> ) | $R^2_{\text{PERMANOVA}}: 0.008$<br>$p_{\text{PERMANOVA}}: 0.001$      |
| Time since fertilization<br>(-10, 5, 21, and 69 days)              | $R^2_{\text{PERMANOVA}}: 0.003$<br>$p_{\text{PERMANOVA}}: 0.015$      |
| Fertilization history<br>(fertilized or unfertilized)              | $R^2_{\text{PERMANOVA}}: 0.002$<br>$p_{\text{PERMANOVA}}: \text{n.s}$ |

788

789 Table S2. Kruskal-Wallis with post hoc Dunn’s test comparing the average relative abundances of  
 790 phyla between DNA and RNA microbial communities.

| Phylum                           | Average relative abundance |        | p-value  |
|----------------------------------|----------------------------|--------|----------|
|                                  | DNA                        | RNA    |          |
| <i>Acidobacteria</i>             | 17.88%                     | 16.29% | 6.54E-09 |
| <i>Actinobacteria</i>            | 26.46%                     | 8.18%  | 2.22E-87 |
| <i>Armatimonadetes</i>           | 0.31%                      | 0.23%  | 1.92E-17 |
| <i>Bacteroidetes</i>             | 6.02%                      | 2.34%  | 1.13E-77 |
| <i>Chlamydiae</i>                | 0.05%                      | 0.10%  | 1.60E-93 |
| <i>Chloroflexi</i>               | 2.58%                      | 1.47%  | 3.04E-90 |
| <i>Cyanobacteria/Chloroplast</i> | 0.02%                      | 0.03%  | 7.67E-93 |
| <i>Deinococcus-Thermus</i>       | 0.00%                      | 0.02%  | 4.75E-07 |
| <i>Firmicutes</i>                | 1.05%                      | 12.90% | 1.13E-92 |
| <i>Gemmatimonadetes</i>          | 2.81%                      | 0.14%  | 1.33E-87 |
| <i>Hydrogenedentes</i>           | 0.00%                      | 0.00%  | 7.75E-83 |
| <i>Ignavibacteriae</i>           | 0.01%                      | 0.01%  | 2.61E-11 |
| <i>Latescibacteria</i>           | 0.28%                      | 0.10%  | 4.30E-83 |
| <i>Nitrospirae</i>               | 0.45%                      | 0.33%  | 1.69E-74 |
| <i>Parcubacteria</i>             | 0.05%                      | 0.00%  | 7.05E-68 |
| <i>Planctomycetes</i>            | 2.64%                      | 4.06%  | 4.49E-98 |
| <i>Proteobacteria</i>            | 32.76%                     | 48.97% | 3.08E-90 |
| <i>Spirochaetes</i>              | 0.01%                      | 0.01%  | 1.50E-94 |
| <i>Tenericutes</i>               | 0.00%                      | 0.00%  | 1.93E-33 |
| <i>Verrucomicrobia</i>           | 6.63%                      | 4.81%  | 3.18E-15 |

791



792 Table S3. Pairwise permutational multivariate analysis of variance (PERMANOVA) for  
 793 comparing the effect of stand age and fertilization on the DNA and RNA microbial community  
 794 dissimilarity.

| Response variable       | Stand age                                | N fertilization amount (kg N ha <sup>-1</sup> ) |
|-------------------------|------------------------------------------|-------------------------------------------------|
| DNA microbial community | 4-year-old vs 3-year-old                 | 0 vs 224                                        |
|                         | $R^2_{\text{pairwisePERMANOVA}} = 0.063$ | $R^2_{\text{pairwisePERMANOVA}} = 0.014$        |
|                         | $p_{\text{pairwisePERMANOVA}} = 0.001$   | $p_{\text{pairwisePERMANOVA}} = 0.023$          |
|                         | 4-year-old vs 2-year-old                 | 0 vs 448                                        |
|                         | $R^2_{\text{pairwisePERMANOVA}} = 0.073$ | $R^2_{\text{pairwisePERMANOVA}} = 0.021$        |
|                         | $p_{\text{pairwisePERMANOVA}} = 0.001$   | $p_{\text{pairwisePERMANOVA}} = 0.018$          |
| RNA microbial community | 3-year-old vs 2-year-old                 | 224 vs 448                                      |
|                         | $R^2_{\text{pairwisePERMANOVA}} = 0.210$ | $R^2_{\text{pairwisePERMANOVA}} = 0.015$        |
|                         | $p_{\text{pairwisePERMANOVA}} = 0.001$   | $p_{\text{pairwisePERMANOVA}} = 0.023$          |
|                         | 4-year-old vs 3-year-old                 | 0 vs 224                                        |
|                         | $R^2_{\text{pairwisePERMANOVA}} = 0.039$ | $R^2_{\text{pairwisePERMANOVA}} = 0.011$        |
|                         | $p_{\text{pairwisePERMANOVA}} = 0.001$   | $p_{\text{pairwisePERMANOVA}} = 0.031$          |
| DNA microbial community | 4-year-old vs 2-year-old                 | 0 vs 448                                        |
|                         | $R^2_{\text{pairwisePERMANOVA}} = 0.057$ | $R^2_{\text{pairwisePERMANOVA}} = 0.013$        |
|                         | $p_{\text{pairwisePERMANOVA}} = 0.001$   | $p_{\text{pairwisePERMANOVA}} = 0.029$          |
|                         | 3-year-old vs 2-year-old                 | 224 vs 448                                      |
|                         | $R^2_{\text{pairwisePERMANOVA}} = 0.152$ | $R^2_{\text{pairwisePERMANOVA}} = 0.012$        |
|                         | $p_{\text{pairwisePERMANOVA}} = 0.001$   | $p_{\text{pairwisePERMANOVA}} = 0.029$          |

795

796 Table S4. Pairwise permutational multivariate analysis of variance (PERMANOVA) for  
 797 comparing the effect of time since fertilization on the DNA and RNA microbial community  
 798 dissimilarity.

| Response variable       | Time since fertilization |                                                                                     |
|-------------------------|--------------------------|-------------------------------------------------------------------------------------|
| DNA microbial community | -10 vs 5                 | n.s                                                                                 |
|                         | -10 vs 21                | n.s                                                                                 |
|                         | -10 vs 69                | n.s                                                                                 |
|                         | 5 vs 21                  | n.s                                                                                 |
|                         | 5 vs 69                  | n.s                                                                                 |
|                         | 21 vs 69                 | n.s                                                                                 |
| RNA microbial community | -10 vs 5                 | n.s                                                                                 |
|                         | -10 vs 21                | n.s                                                                                 |
|                         | -10 vs 69                | $R^2_{\text{pairwisePERMANOVA}} = 0.018,$<br>$P_{\text{pairwisePERMANOVA}} = 0.018$ |
|                         | 5 vs 21                  | n.s                                                                                 |
|                         | 5 vs 69                  | n.s                                                                                 |
|                         | 21 vs 69                 | n.s                                                                                 |

799

800 Table S5. Kruskal-Wallis with post hoc Dunn's test comparing the average relative abundances of  
 801 phyla between DNA and RNA microbial communities by different N fertilization. Denote N0,  
 802 N224, and N448 are N fertilization of 0 kg N ha<sup>-1</sup>, 224 kg N ha<sup>-1</sup>, and 448 kg N ha<sup>-1</sup>, respectively.

|                         | Phylum                  | Difference in average relative abundance |                                 | p-value                           |
|-------------------------|-------------------------|------------------------------------------|---------------------------------|-----------------------------------|
|                         |                         |                                          |                                 |                                   |
| DNA microbial community | <i>Acidobacteria</i>    | 18.44%                                   | 17.23%                          | 3.62E-02<br>between N0 and N448   |
|                         | <i>Chloroflexi</i>      | 2.30%                                    | 2.90%                           | 1.24E-02<br>between N224 and N448 |
|                         | <i>Latescibacteria</i>  | 0.32%                                    | 0.30%                           | 1.79E-04<br>between N0 and N448   |
|                         |                         | 0.30%                                    | 0.21%                           | 1.30E-03<br>between N224 and N448 |
|                         | <i>Proteobacteria</i>   | 31.54%                                   | 34.10%                          | 3.17E-04<br>between N0 and N448   |
| RNA microbial community | <i>Actinobacteria</i>   | 9.18%                                    | 7.39%                           | 1.33E-03<br>between N224 and N448 |
|                         | <i>Firmicutes</i>       | 12.91%                                   | 13.78%                          | 2.55E-03<br>between N224 and N448 |
|                         | <i>Gemmatimonadetes</i> | 0.12%                                    | 0.13%                           | 4.52E-02<br>between N0 and N448   |
|                         | <i>Hydrogenedentes</i>  | 0.0054%                                  | 0.0047%                         | 2.47E-02<br>between N0 and N224   |
|                         |                         | 0.0047%                                  | 0.0035%                         | 2.62E-02<br>between N224 and N448 |
|                         | <i>Latescibacteria</i>  | 0.10%                                    | 0.08%                           | 3.87E-03<br>between N224 and N448 |
| <i>Nitrospirae</i>      | 0.30%                   | 0.31%                                    | 1.59E-04<br>between N0 and N448 |                                   |
|                         | <i>Proteobacteria</i>   | 50.08%                                   | 49.46%                          | 3.27E-05<br>between N0 and N448   |

803

804 Table S6. Kruskal-Wallis with post hoc Dunn's test comparing the average relative abundances of  
805 nitrogen cycling functions in RNA microbial communities by time since fertilization.

|           | Function        | Days     |         | Relative abundance |       | p-value  |
|-----------|-----------------|----------|---------|--------------------|-------|----------|
|           |                 |          |         |                    |       |          |
| RNA       | Denitrification | -10 days | 69 days | 0.85%              | 1.15% | 1.52E-08 |
| microbial |                 | 5 days   | 69 days | 0.95%              | 1.15% | 7.72E-03 |
| community |                 | 21 days  | 69 days | 0.94%              | 1.15% | 2.72E-03 |

806
